# Supplementary material
Source: PubMed Central journal article supplement (PMC5772766)
Supplement: NIHMS926543-supplement-Supplemental_tables.pdf [file NIHMS926543-supplement-Supplemental_tables.pdf]

# Predicting Nano-bio Interactions by Integrating Nanoparticle Libraries and Quantitative Nanostructure Activity Relationship Modeling

Wenyi Wang<sup>1</sup>, Alexander Sedykh<sup>1, 2</sup>, Hainan Sun<sup>3</sup>, Linlin Zhao<sup>1</sup>, Daniel P. Russo<sup>1</sup>, Hongyu Zhou<sup>4</sup>, Bing Yan<sup>3\*</sup> and Hao Zhu<sup>1, 5\*</sup>

<sup>1</sup> The Rutgers Center for Computational and Integrative Biology, Camden, New Jersey 08102, USA;

<sup>2</sup> Sciome, Research Triangle Park, NC 27709, USA;

<sup>3</sup> School of Environmental Science and Engineering, Shandong University, Jinan 250100, China;

<sup>4</sup> School of Environment, Jinan University, Guangzhou, 510632, China;

<sup>5</sup> Department of Chemistry, Rutgers University, Camden, New Jersey 08102, USA

\*Corresponding authors:

Hao Zhu  
315 Penn St.  
Department of Chemistry, Rutgers University  
Camden, NJ 08102, USA  
Telephone: (856) 225-6781  
Email: [hao.zhu99@rutgers.edu](mailto:hao.zhu99@rutgers.edu)

Bing Yan  
School of Environmental Science and Engineering,  
Shandong University,  
Jinan 250100, China  
E-mail: [drbingyan@yahoo.com](mailto:drbingyan@yahoo.com)

**Supplementary Table SI.** Experimental characterization of the GNP library members including seven series

**Series 1**

| GNP index | # Ligand / GNP                                                                    |                                                                                   | Size (TEM) (nm) | Zeta potential in water (mV) | Zeta potential in 10% FBS (mV) | Hydrodynamic diameters in water (nm) | PDI in water | Hydrodynamic diameters in 10% FBS (nm) | PDI in 10% FBS | LogP       | HO-1 level in A549 | Cell uptake in A549 ( $10^7$ GNP/cell) | Cell uptake in HEK293 ( $10^7$ GNP/cell) |
|-----------|-----------------------------------------------------------------------------------|-----------------------------------------------------------------------------------|-----------------|------------------------------|--------------------------------|--------------------------------------|--------------|----------------------------------------|----------------|------------|--------------------|----------------------------------------|------------------------------------------|
|           | 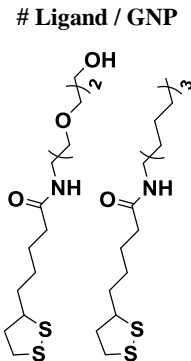 |  |                 |                              |                                |                                      |              |                                        |                |            |                    |                                        |                                          |
| 1         | 459 (100%)                                                                        | 0 (0%)                                                                            | 7.3             | -13.1±1.6                    | -19.4±0.4                      | 221.0±10.0                           | 0.367        | 133.2±0.7                              | 0.224          | -2.67±0.06 | 0.44±0.11          | 0.2±0.02                               | 0.43±0.03                                |
| 2         | 346 (90%)                                                                         | 40 (10%)                                                                          | 6.8             | -10.0±1.3                    | -18.5±0.9                      | 149.9±7.21                           | 0.145        | 151.1±1.1                              | 0.124          | -2.47±0.08 | 0.47±0.08          | 0.41±0.33                              | 0.5±0.18                                 |
| 3         | 311 (74%)                                                                         | 107 (26%)                                                                         | 8.5             | -10.3±0.2                    | -18.3±0.8                      | 156.5±8.06                           | 0.2          | 157.7±0.7                              | 0.222          | -1.61±0.15 | 1.33±0.13          | 1.32±0.23                              | 1.71±0.21                                |
| 4         | 240 (49%)                                                                         | 251 (51%)                                                                         | 8               | -14.1±0.3                    | -18.5±1.0                      | 301.2±4.8                            | 0.211        | 216.6±2.9                              | 0.176          | -0.88±0.17 | 1.93±0.12          | 1.73±0.08                              | 1.93±0.08                                |
| 5         | 147 (27%)                                                                         | 390 (73%)                                                                         | 7.5             | -17.5±1.2                    | -18.5±0.8                      | 247.8±8.8                            | 0.139        | 252.8±4.8                              | 0.205          | -0.66±0.05 | 3.4±0.28           | 2.41±0.18                              | 3.18±0.19                                |
| 6         | 86 (15%)                                                                          | 477 (85%)                                                                         | 8               | -20.7±0.1                    | -17.3±0.7                      | 261.0±2.1                            | 0.207        | 329.8±3.0                              | 0.322          | -0.02±0.26 | 3.23±0.18          | 2.51±0.27                              | 3.33±0.08                                |
| 7         | 0 (0%)                                                                            | 727 (100%)                                                                        | 6.7             | -21.1±0.2                    | -19.4±1.0                      | 269±0.8                              | 0.232        | 303.8±1.1                              | 0.343          | 2.4±0.1    | 4.1±0.41           | 6.13±1.24                              | 5.39±0.55                                |

Series 2

| GNP index | # Ligand / GNP |            | Size (TEM) (nm) | Zeta potential in water (mV) | Zeta potential in 10% FBS (mV) | Hydrodynamic diameters in water (nm) | PDI in water | Hydrodynamic diameters in 10% FBS (nm) | PDI in 10% FBS | LogP       | HO-1 level in A549 | Cell uptake in A549 (10 <sup>7</sup> GNP/cell) | Cell uptake in HEK293 (10 <sup>7</sup> GNP/cell) |
|-----------|----------------|------------|-----------------|------------------------------|--------------------------------|--------------------------------------|--------------|----------------------------------------|----------------|------------|--------------------|------------------------------------------------|--------------------------------------------------|
|           |                |            |                 |                              |                                |                                      |              |                                        |                |            |                    |                                                |                                                  |
|           |                |            |                 |                              |                                |                                      |              |                                        |                |            |                    |                                                |                                                  |
| <b>8*</b> | 232 (100%)     | 0 (0%)     | 5.8             | -7.2±0.3                     | -21.4±0.3                      | 106.1±1.4                            | 0.154        | 133.5±2.5                              | 0.238          | -2.56±0.02 | 1.42±0.44          | 0.49±0.02                                      | 0.49±0.02                                        |
| <b>9</b>  | 116 (85%)      | 21 (15%)   | 5.8             | 39.4±0.5                     | -23.1±0.2                      | 105.5±2.3                            | 0.208        | 127.4±5.4                              | 0.176          | -2.52±0.11 | 1.95±0.54          | 0.75±0.02                                      | 0.65±0.03                                        |
| <b>10</b> | 101 (77%)      | 31 (23%)   | 5.8             | 42.9±0.6                     | -26.1±0.7                      | 105.4±1.6                            | 0.183        | 102.2±3.4                              | 0.149          | -2.68±0.11 | 2.98±0.4           | 1.64±0.03                                      | 1.81±0.27                                        |
| <b>11</b> | 75 (48%)       | 82 (52%)   | 5.8             | 47.6±1.2                     | -29.3±0.9                      | 70.8±7.4                             | 0.423        | 99.2±5.8                               | 0.338          | -2.35±0.11 | 3.75±0.44          | 2.39±0.11                                      | 2.64±0.32                                        |
| <b>12</b> | 0 (0%)         | 144 (100%) | 5.8             | 65.3±1.7                     | -22.4±0.2                      | 70.7±7.8                             | 0.332        | 102.4±6.9                              | 0.294          | -1.74±0.19 | 3.93±0.60          | 4.86±0.41                                      | 4.12±0.69                                        |

\*This one (GNP #8) is same as the first ones in the following three series (series 3,4,5), thus they are all marked as GNP #8.

Series 3

| GNP index | # Ligand / GNP                                                                    |                                                                                   | Size (TEM) (nm) | Zeta potential in water (mV) | Zeta potential in 10% FBS (mV) | Hydrodynamic diameters in water (nm) | PDI in water | Hydrodynamic diameters in 10% FBS (nm) | PDI in 10% FBS | LogP       | HO-1 level in A549 | Cell uptake in A549 (10 <sup>7</sup> GNP/cell) | Cell uptake in HEK293 (10 <sup>7</sup> GNP/cell) |
|-----------|-----------------------------------------------------------------------------------|-----------------------------------------------------------------------------------|-----------------|------------------------------|--------------------------------|--------------------------------------|--------------|----------------------------------------|----------------|------------|--------------------|------------------------------------------------|--------------------------------------------------|
|           | 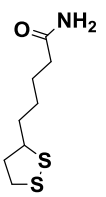 |  |                 |                              |                                |                                      |              |                                        |                |            |                    |                                                |                                                  |
| 8         | 232 (100%)                                                                        | 0 (0%)                                                                            | 5.8             | -7.2±0.3                     | -21.4±0.3                      | 106.1±1.4                            | 0.154        | 133.5±2.5                              | 0.238          | -2.56±0.02 | 1.42±0.44          | 0.49±0.02                                      | 0.49±0.02                                        |
| 13        | 201 (87%)                                                                         | 31 (13%)                                                                          | 5.8             | -30.7±0.2                    | -26.3±0.8                      | 121.6±1.1                            | 0.122        | 102.5±3.7                              | 0.283          | -2.59±0.07 | 0.94±0.17          | 0.41±0.03                                      | 0.45±0.05                                        |
| 14        | 108 (47%)                                                                         | 124 (53%)                                                                         | 5.8             | -33.9±1.2                    | -30.6±0.9                      | 130.8±1.8                            | 0.188        | 124.6±2.6                              | 0.183          | -2.4±0.07  | 1.26±0.1           | 0.48±0.04                                      | 0.46±0.02                                        |
| 15        | 62 (27%)                                                                          | 170 (73%)                                                                         | 5.8             | -38.8±0.5                    | -29.3±0.5                      | 137.7±2.9                            | 0.167        | 145.3±2.9                              | 0.174          | -2.3±0.16  | 0.88±0.32          | 0.42±0.02                                      | 0.44±0.04                                        |
| 16        | 0 (0%)                                                                            | 287 (100%)                                                                        | 5.8             | -41.5±1.1                    | -25.9±0.7                      | 147.7±0.9                            | 0.191        | 112.4±4.6                              | 0.116          | -2.21±0.12 | 0.89±0.32          | 0.44±0.04                                      | 0.42±0.04                                        |

Series 4

| GNP index | # Ligand / GNP                                                                    |            | Size (TEM) (nm) | Zeta potential in water (mV) | Zeta potential in 10% FBS (mV) | Hydrodynamic diameters in water (nm) | PDI in water | Hydrodynamic diameters in 10% FBS (nm) | PDI in 10% FBS | LogP       | HO-1 level in A549 | Cell uptake in A549 (10 <sup>7</sup> GNP/cell) | Cell uptake in HEK293 (10 <sup>7</sup> GNP/cell) |
|-----------|-----------------------------------------------------------------------------------|------------|-----------------|------------------------------|--------------------------------|--------------------------------------|--------------|----------------------------------------|----------------|------------|--------------------|------------------------------------------------|--------------------------------------------------|
|           |                                                                                   |            |                 |                              |                                |                                      |              |                                        |                |            |                    |                                                |                                                  |
|           | 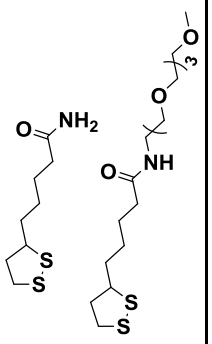 |            |                 |                              |                                |                                      |              |                                        |                |            |                    |                                                |                                                  |
| 8         | 232 (100%)                                                                        | 0 (0%)     | 5.8             | -7.2±0.3                     | -21.4±0.3                      | 106.1±1.4                            | 0.154        | 133.5±2.5                              | 0.238          | -2.56±0.02 | 1.42±0.44          | 0.49±0.02                                      | 0.49±0.02                                        |
| 17        | 676 (91%)                                                                         | 67 (9%)    | 6.9             | -25.1±0.8                    | -9.19±0.4                      | 160.1±3.3                            | 0.193        | 167.9±3.0                              | 0.191          | -1.72±0.35 | 2.86±0.32          | 0.69±0.02                                      | 0.69±0.03                                        |
| 18        | 472 (75%)                                                                         | 158 (25%)  | 6.6             | -25.3±1.1                    | -10.2±0.3                      | 207.9±4.6                            | 0.366        | 175.9±3.2                              | 0.288          | -2.08±0.06 | 2.38±0.29          | 0.61±0.03                                      | 0.59±0.02                                        |
| 19        | 327 (55%)                                                                         | 268 (45%)  | 6.4             | -17.8±0.4                    | -12.9±0.2                      | 162.5±8.7                            | 0.261        | 184.9±3.9                              | 0.295          | -2.19±0.16 | 2.07±0.27          | 0.58±0.07                                      | 0.57±0.04                                        |
| 20        | 0 (0%)                                                                            | 720 (100%) | 6.5             | -11.3±0.2                    | -21.4±0.7                      | 154.7±2.7                            | 0.003        | 143.3±4.7                              | 0.392          | -1.92±0.06 | 2.46±0.25          | 0.62±0.05                                      | 0.6±0.02                                         |

Series 5

| GNP index | # Ligand / GNP |            | Size (TEM) (nm) | Zeta potential in water (mV) | Zeta potential in 10% FBS (mV) | Hydrodynamic diameters in water (nm) | PDI in water | Hydrodynamic diameters in 10% FBS (nm) | PDI in 10% FBS | LogP       | HO-1 level in A549 | Cell uptake in A549 (10 <sup>7</sup> GNP/cell) | Cell uptake in HEK293 (10 <sup>7</sup> GNP/cell) |
|-----------|----------------|------------|-----------------|------------------------------|--------------------------------|--------------------------------------|--------------|----------------------------------------|----------------|------------|--------------------|------------------------------------------------|--------------------------------------------------|
|           |                |            |                 |                              |                                |                                      |              |                                        |                |            |                    |                                                |                                                  |
| 8         | 232 (100%)     | 0 (0%)     | 5.8             | -7.2±0.3                     | -21.4±0.3                      | 106.1±1.4                            | 0.154        | 133.5±2.5                              | 0.238          | -2.56±0.02 | 1.42±0.44          | 0.49±0.02                                      | 0.49±0.02                                        |
| 21        | 673 (88%)      | 92 (12%)   | 4.9             | -13.0±0.2                    | -24.6±1.3                      | 459.8±10.2                           | 0.314        | 260.2±3.6                              | 0.145          | -1.8±0.2   | 2.89±0.24          | 0.85±0.04                                      | 0.81±0.01                                        |
| 22        | 502 (69%)      | 226 (31%)  | 5               | -4.0±0.1                     | -20.9±0.9                      | 450.0± 9.8                           | 0.395        | 252.3±3.3                              | 0.235          | -0.96±0.05 | 1.41±0.24          | 0.68±0.04                                      | 0.7±0.04                                         |
| 23        | 221 (29%)      | 542 (71%)  | 5.7             | -11.6±0.4                    | -12.2±0.3                      | 546.3±10.4                           | 0.391        | 218.0±2.2                              | 0.066          | -2.42±0.04 | 1.73±0.1           | 0.49±0.06                                      | 0.47±0.02                                        |
| 24        | 0 (0%)         | 810 (100%) | 8               | -15.8±0.3                    | -18.5±0.5                      | 149.6±1.8                            | 0.431        | 192.4±1.9                              | 0.18           | -2.28±0.13 | 1.06±0.11          | 0.48±0.02                                      | 0.45±0.06                                        |

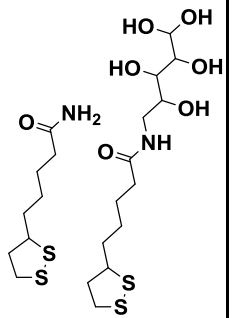

Series 6

| GNP index | # Ligand / GNP                                                                    |                                                                                   | Size (TEM) (nm) | Zeta potential in water (mV) | Zeta potential in 10% FBS (mV) | Hydrodynamic diameters in water (nm) | PDI in water | Hydrodynamic diameters in 10% FBS (nm) | PDI in 10% FBS | LogP      | HO-1 level in A549 | Cell uptake in A549 (10 <sup>7</sup> GNP/cell) | Cell uptake in HEK293 (10 <sup>7</sup> GNP/cell) |
|-----------|-----------------------------------------------------------------------------------|-----------------------------------------------------------------------------------|-----------------|------------------------------|--------------------------------|--------------------------------------|--------------|----------------------------------------|----------------|-----------|--------------------|------------------------------------------------|--------------------------------------------------|
|           | 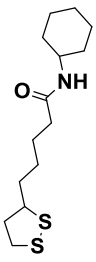 |  |                 |                              |                                |                                      |              |                                        |                |           |                    |                                                |                                                  |
| 25        | 869 (100%)                                                                        | 0 (0%)                                                                            | 7.3             | -24.4±0.6                    | -29.3±0.5                      | 273.2±2.1                            | 0.138        | 224.5±4.3                              | 0.248          | 2.06±0.28 | 2.58±0.3           | 4.87±0.47                                      | 5.04±0.55                                        |
| 26        | 695 (80%)                                                                         | 174 (20%)                                                                         | 7.3             | -27.9±1.1                    | -32.4±0.9                      | 281.2±3.4                            | 0.283        | 224.3±2.9                              | 0.195          | 2.38±0.19 | 2.28±0.23          | 5.03±0.59                                      | 5.31±0.66                                        |
| 27        | 348 (40%)                                                                         | 521 (60%)                                                                         | 7.3             | -22.0±1.1                    | -28.6±0.7                      | 236.3±5.7                            | 0.199        | 233.2±1.8                              | 0.374          | 2.72±0.2  | 2.21±0.14          | 5.39±0.60                                      | 5.58±0.26                                        |
| 28        | 174 (20%)                                                                         | 695 (80%)                                                                         | 7.3             | -22.5±0.5                    | -23.4±0.2                      | 249.5±4.6                            | 0.273        | 244.9±4.3                              | 0.294          | 2.67±0.07 | 1.89±0.15          | 5.59±0.73                                      | 5.26±0.33                                        |
| 29        | 0 (0%)                                                                            | 869 (100%)                                                                        | 7.3             | -23.0±0.5                    | -28.3±0.7                      | 238.2±7.5                            | 0.263        | 213.8±5.3                              | 0.327          | 2.7±0.14  | 2.21±0.28          | 5.8±0.65                                       | 5.26±0.49                                        |

Series 7

| GNP index | # Ligand / GNP                                                                                | Size (TEM) (nm) | Zeta potential in water (mV) | Zeta potential in 10% FBS (mV) | Hydrodynamic diameters in water (nm) | PDI in water | Hydrodynamic diameters in 10% FBS (nm) | PDI in 10% FBS | LogP      | HO-1 level in A549 | Cell uptake in A549 (10 <sup>7</sup> GNP/cell) | Cell uptake in HEK293 (10 <sup>7</sup> GNP/cell) |
|-----------|-----------------------------------------------------------------------------------------------|-----------------|------------------------------|--------------------------------|--------------------------------------|--------------|----------------------------------------|----------------|-----------|--------------------|------------------------------------------------|--------------------------------------------------|
| 30        | 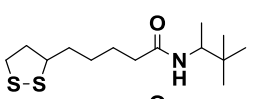 795 (100%)  | 5.9             | -8.0±0.8                     | -13.8±0.3                      | 236.0±6.1                            | 0.178        | 212.0±5.0                              | 0.299          | 2.52±0.13 | 2.28±0.14          | 5.33±0.75                                      | 5.16±0.65                                        |
| 31        |  682 (100%)  | 5.9             | -8.5±0.2                     | -21.1±0.4                      | 252.5±5.5                            | 0.259        | 154.0±2.7                              | 0.444          | 2.28±0.25 | 2.06±0.16          | 5.84±0.4                                       | 5.27±0.76                                        |
| 32        |  830 (100%)  | 5.9             | -7.4±0.3                     | -21.8±0.5                      | 225.8±8.5                            | 0.185        | 189.9±3.0                              | 0.342          | 2.57±0.07 | 1.92±0.19          | 5.4±0.49                                       | 5.09±0.43                                        |
| 33        |  698(100%)   | 5.9             | -12.4±0.6                    | -11.7±0.4                      | 232.4±1.6                            | 0.219        | 189.1±3.3                              | 0.389          | 1.76±0.06 | 2.11±0.28          | 5.39±0.58                                      | 5.2±0.58                                         |
| 34        |  703 (100%) | 5.9             | -5.7±0.4                     | -17.0±0.2                      | 284.5±8.3                            | 0.213        | 210.7±5.8                              | 0.407          | 1.98±0.07 | 2.21±0.23          | 5.55±0.48                                      | 5.19±0.67                                        |



**Supplementary Table SII.** The calculated nanodescriptors with their nano-composition and structure

| Index | Series | Radius(Ang) | #lig1 | #lig2 | total#Ligand | TotalSurface Area | AverageSurfaceAreaPerLigand |
|-------|--------|-------------|-------|-------|--------------|-------------------|-----------------------------|
| 1     | HY 1   | 36.5        | 459   | 0     | 459          | 76,869            | 167                         |
| 2     | HY 2   | 34          | 346   | 40    | 386          | 69,746            | 181                         |
| 3     | HY 3   | 42.5        | 311   | 107   | 418          | 100,385           | 240                         |
| 4     | HY 4   | 40          | 240   | 251   | 491          | 98,719            | 201                         |
| 5     | HY 5   | 37.5        | 147   | 390   | 537          | 89,277            | 166                         |
| 6     | HY 6   | 40          | 86    | 477   | 563          | 99,999            | 178                         |
| 7     | HY 7   | 33.5        | 0     | 727   | 727          | 83,923            | 115                         |
| 8     | PO 1   | 29          | 0     | 232   | 232          | 39,980            | 172                         |
| 9     | PO 2   | 29          | 21    | 116   | 137          | 38,158            | 279                         |
| 10    | PO 3   | 29          | 31    | 101   | 132          | 37,158            | 281                         |
| 11    | PO 4   | 29          | 82    | 75    | 157          | 39,017            | 249                         |
| 12    | PO 5   | 29          | 144   | 0     | 144          | 40,072            | 278                         |
| 13    | NE 2   | 29          | 31    | 201   | 232          | 40,324            | 174                         |
| 14    | NE 3   | 29          | 124   | 108   | 232          | 40,960            | 177                         |
| 15    | NE 4   | 29          | 170   | 62    | 232          | 42,036            | 181                         |
| 16    | NE 5   | 29          | 287   | 0     | 287          | 44,688            | 156                         |
| 17    | HA 2   | 34.5        | 67    | 676   | 743          | 59,553            | 80                          |
| 18    | HA 3   | 33          | 158   | 472   | 630          | 55,987            | 89                          |
| 19    | HA 4   | 32          | 268   | 327   | 595          | 62,725            | 105                         |
| 20    | HA 5   | 32.5        | 720   | 0     | 720          | 65,224            | 91                          |
| 21    | HD 2   | 24.5        | 92    | 673   | 765          | 39,259            | 51                          |
| 22    | HD 3   | 25          | 226   | 502   | 728          | 42,573            | 58                          |
| 23    | HD 4   | 28.5        | 542   | 221   | 763          | 52,685            | 69                          |
| 24    | HD 5   | 40          | 810   | 0     | 810          | 99,863            | 123                         |
| 25    | PI 1   | 36.5        | 0     | 869   | 869          | 78,732            | 91                          |
| 26    | PI 2   | 36.5        | 174   | 695   | 869          | 76,487            | 88                          |
| 27    | PI 3   | 36.5        | 521   | 348   | 869          | 76,351            | 88                          |
| 28    | PI 4   | 36.5        | 695   | 174   | 869          | 75,533            | 87                          |
| 29    | PI 5   | 36.5        | 869   | 0     | 869          | 74,966            | 86                          |
| 30    | MG 1   | 29.5        | 795   | 0     | 795          | 45,299            | 57                          |
| 31    | MG 2   | 29.5        | 682   | 0     | 682          | 43,279            | 63                          |
| 32    | MG 3   | 29.5        | 830   | 0     | 830          | 48,982            | 59                          |
| 33    | MG 4   | 29.5        | 698   | 0     | 698          | 54,508            | 78                          |
| 34    | MG 5   | 29.5        | 703   | 0     | 703          | 47,638            | 68                          |
| 35    | HY_e   | 32.5        | 0     | 536   | 536          | 79,934            | 149                         |
| 36    | Po_e   | 29          | 42    | 102   | 144          | 38,379            | 267                         |
| 37    | Ne_e   | 29          | 47    | 185   | 232          | 40,446            | 174                         |
| 38    | HA_e   | 26          | 380   | 126   | 506          | 47,689            | 94                          |
| 39    | HD_e   | 25          | 235   | 275   | 510          | 43,634            | 86                          |
| 40    | PI_e   | 36.5        | 348   | 521   | 869          | 78,833            | 91                          |
| 41    | MG_e   | 29.5        | 869   | 0     | 869          | 48,407            | 56                          |

| Index | TotalPartialCharge | AveragePartialChargePerLigand | HydrophobicPotential | PotentialEnergy | contactpreference_hyd.grid_ave | contactpreference_hyd.grid_aboveThreshold | contactpreference_lpa.grid_ave |
|-------|--------------------|-------------------------------|----------------------|-----------------|--------------------------------|-------------------------------------------|--------------------------------|
| 1     | -78                | -0.17                         | -0.37                | 7.95E+08        | 0.68                           | 8,368                                     | 0.56                           |
| 2     | -71                | -0.18                         | 0.01                 | 6.59E+08        | 0.69                           | 7,542                                     | 0.55                           |
| 3     | -54                | -0.13                         | 0.47                 | 7.11E+08        | 0.67                           | 7,236                                     | 0.55                           |
| 4     | -61                | -0.12                         | 1.17                 | 8.55E+08        | 0.70                           | 8,345                                     | 0.53                           |
| 5     | -68                | -0.13                         | 1.83                 | 9.21E+08        | 0.71                           | 9,065                                     | 0.52                           |
| 6     | -96                | -0.17                         | 2.18                 | 9.82E+08        | 0.71                           | 9,574                                     | 0.52                           |
| 7     | -83                | -0.11                         | 3.62                 | 1.26E+09        | 0.72                           | 10,355                                    | 0.49                           |
| 8     | -55                | -0.24                         | 0.65                 | 3.85E+08        | 0.64                           | 14,221                                    | 0.58                           |
| 9     | -6                 | -0.04                         | 0.52                 | 2.31E+08        | 0.61                           | 11,263                                    | 0.58                           |
| 10    | 2                  | 0.01                          | 0.31                 | 2.25E+08        | 0.61                           | 9,947                                     | 0.58                           |
| 11    | 43                 | 0.27                          | 0.22                 | 2.63E+08        | 0.62                           | 8,733                                     | 0.58                           |
| 12    | 105                | 0.73                          | 0.07                 | 2.49E+08        | 0.63                           | 7,757                                     | 0.58                           |
| 13    | -69                | -0.30                         | 0.65                 | 3.91E+08        | 0.64                           | 14,298                                    | 0.58                           |
| 14    | -165               | -0.71                         | 0.50                 | 3.93E+08        | 0.63                           | 13,913                                    | 0.58                           |
| 15    | -220               | -0.95                         | 0.45                 | 3.92E+08        | 0.63                           | 14,359                                    | 0.58                           |
| 16    | -346               | -1.20                         | 0.24                 | 4.87E+08        | 0.63                           | 12,972                                    | 0.59                           |
| 17    | -125               | -0.17                         | -0.06                | 1.27E+09        | 0.67                           | 10,857                                    | 0.59                           |
| 18    | -107               | -0.17                         | -0.01                | 1.08E+09        | 0.69                           | 9,651                                     | 0.56                           |
| 19    | -98                | -0.16                         | 0.15                 | 1.01E+09        | 0.70                           | 9,606                                     | 0.55                           |
| 20    | -87                | -0.12                         | 1.05                 | 1.23E+09        | 0.72                           | 8,307                                     | 0.52                           |
| 21    | -81                | -0.11                         | -1.62                | 1.35E+09        | 0.62                           | 9,698                                     | 0.63                           |
| 22    | -118               | -0.16                         | -1.92                | 1.25E+09        | 0.62                           | 7,928                                     | 0.62                           |
| 23    | -134               | -0.18                         | -2.12                | 1.30E+09        | 0.62                           | 6,603                                     | 0.63                           |
| 24    | -134               | -0.17                         | -1.16                | 1.37E+09        | 0.64                           | 8,292                                     | 0.62                           |
| 25    | -128               | -0.15                         | 2.92                 | 1.49E+09        | 0.72                           | 8,789                                     | 0.50                           |
| 26    | -149               | -0.17                         | 3.04                 | 1.50E+09        | 0.72                           | 9,562                                     | 0.51                           |
| 27    | -115               | -0.13                         | 3.34                 | 1.49E+09        | 0.72                           | 12,183                                    | 0.51                           |
| 28    | -90                | -0.10                         | 3.65                 | 1.50E+09        | 0.71                           | 13,700                                    | 0.51                           |
| 29    | -101               | -0.12                         | 4.22                 | 1.50E+09        | 0.71                           | 15,243                                    | 0.51                           |
| 30    | -138               | -0.17                         | 4.99                 | 1.38E+09        | 0.72                           | 16,759                                    | 0.45                           |
| 31    | -145               | -0.21                         | 6.38                 | 1.18E+09        | 0.72                           | 16,226                                    | 0.46                           |
| 32    | -130               | -0.16                         | 4.10                 | 1.45E+09        | 0.72                           | 17,354                                    | 0.47                           |
| 33    | -90                | -0.13                         | 2.68                 | 1.21E+09        | 0.72                           | 13,643                                    | 0.49                           |
| 34    | -101               | -0.14                         | 5.03                 | 1.23E+09        | 0.73                           | 6,783                                     | 0.50                           |
| 35    | -61                | -0.11                         | 3.04                 | 9.38E+08        | 0.72                           | 11,031                                    | 0.50                           |
| 36    | -11                | -0.08                         | 0.37                 | 2.41E+08        | 0.62                           | 10,930                                    | 0.58                           |
| 37    | -98                | -0.42                         | 0.60                 | 3.90E+08        | 0.64                           | 14,379                                    | 0.58                           |
| 38    | -67                | -0.13                         | 0.59                 | 8.79E+08        | 0.71                           | 11,098                                    | 0.53                           |
| 39    | -91                | -0.18                         | -1.12                | 8.75E+08        | 0.64                           | 9,344                                     | 0.61                           |
| 40    | -118               | -0.14                         | 3.06                 | 1.48E+09        | 0.72                           | 11,075                                    | 0.51                           |
| 41    | -109               | -0.13                         | 4.33                 | 1.51E+09        | 0.72                           | 4,788                                     | 0.49                           |

| <b>Index</b> | contactpreference_lpa.grid_aboveThreshold | electrondensity.grid_average | electrondensity.grid_aboveThreshold | electrostaticmap_acc.grid_avelog | electrostaticmap_acc.grid_aboveThreshold | electrostaticmap_don.grid_avelog | electrostaticmap_don.grid_aboveThreshold |
|--------------|-------------------------------------------|------------------------------|-------------------------------------|----------------------------------|------------------------------------------|----------------------------------|------------------------------------------|
| 1            | 8,602                                     | -3.46                        | 113,728                             | 0.55                             | 82,444                                   | 0.66                             | 82,403                                   |
| 2            | 7,121                                     | -1.71                        | 96,320                              | 0.35                             | 66,018                                   | 0.53                             | 65,924                                   |
| 3            | 5,928                                     | -3.47                        | 147,206                             | 0.24                             | 60,422                                   | 0.49                             | 60,444                                   |
| 4            | 5,152                                     | -1.89                        | 123,387                             | 0.27                             | 57,445                                   | 0.49                             | 57,459                                   |
| 5            | 3,959                                     | 1.30                         | 113,758                             | 0.44                             | 68,064                                   | 0.57                             | 68,361                                   |
| 6            | 3,686                                     | 0.98                         | 130,611                             | 0.46                             | 71,326                                   | 0.59                             | 71,368                                   |
| 7            | 1,661                                     | 3.22                         | 87,989                              | 0.66                             | 86,678                                   | 0.71                             | 86,934                                   |
| 8            | 18,212                                    | 1.83                         | 59,880                              | 0.36                             | 60,618                                   | 0.55                             | 60,694                                   |
| 9            | 15,993                                    | -1.35                        | 63,071                              | 0.32                             | 62,267                                   | 0.50                             | 62,144                                   |
| 10           | 16,091                                    | -0.46                        | 57,257                              | 0.24                             | 52,672                                   | 0.47                             | 52,440                                   |
| 11           | 14,193                                    | 0.55                         | 63,345                              | 0.22                             | 56,077                                   | 0.45                             | 56,197                                   |
| 12           | 14,651                                    | 2.45                         | 59,098                              | 0.20                             | 48,729                                   | 0.44                             | 48,656                                   |
| 13           | 17,903                                    | 0.23                         | 67,533                              | 0.43                             | 72,184                                   | 0.58                             | 72,020                                   |
| 14           | 18,802                                    | -0.27                        | 66,248                              | 0.43                             | 71,752                                   | 0.58                             | 71,638                                   |
| 15           | 19,784                                    | -1.69                        | 62,861                              | 0.47                             | 71,993                                   | 0.59                             | 71,819                                   |
| 16           | 19,659                                    | 0.19                         | 58,549                              | 0.50                             | 65,536                                   | 0.60                             | 65,517                                   |
| 17           | 13,086                                    | -0.12                        | 89,320                              | 0.57                             | 77,223                                   | 0.66                             | 77,094                                   |
| 18           | 9,944                                     | 1.27                         | 89,900                              | 0.52                             | 70,359                                   | 0.62                             | 70,405                                   |
| 19           | 7,089                                     | -2.52                        | 84,782                              | 0.44                             | 65,115                                   | 0.57                             | 65,228                                   |
| 20           | 3,185                                     | -6.14                        | 83,007                              | 0.87                             | 92,134                                   | 1.42                             | 196,239                                  |
| 21           | 21,345                                    | 0.37                         | 55,887                              | 0.86                             | 105,525                                  | 0.87                             | 105,339                                  |
| 22           | 21,829                                    | 3.02                         | 60,001                              | 0.88                             | 107,789                                  | 0.87                             | 107,584                                  |
| 23           | 22,829                                    | -0.95                        | 65,320                              | 0.98                             | 114,291                                  | 0.92                             | 114,039                                  |
| 24           | 19,647                                    | 4.04                         | 141,632                             | 0.70                             | 89,442                                   | 0.75                             | 89,319                                   |
| 25           | 3,865                                     | 0.47                         | 119,384                             | 0.95                             | 109,215                                  | 0.89                             | 109,247                                  |
| 26           | 3,607                                     | -3.10                        | 113,058                             | 0.90                             | 107,931                                  | 0.89                             | 107,914                                  |
| 27           | 3,464                                     | -5.18                        | 107,103                             | 0.91                             | 105,749                                  | 0.90                             | 105,695                                  |
| 28           | 3,319                                     | -3.35                        | 108,897                             | 0.90                             | 104,350                                  | 0.89                             | 104,287                                  |
| 29           | 3,127                                     | -0.79                        | 116,524                             | 0.84                             | 103,367                                  | 0.84                             | 103,234                                  |
| 30           | 1,247                                     | 5.59                         | 64,612                              | 1.16                             | 116,160                                  | 1.04                             | 115,976                                  |
| 31           | 798                                       | 4.98                         | 69,283                              | 1.19                             | 123,430                                  | 1.05                             | 123,880                                  |
| 32           | 1,628                                     | 0.00                         | 63,942                              | 1.13                             | 119,301                                  | 1.03                             | 119,649                                  |
| 33           | 2,838                                     | -3.40                        | 58,519                              | 0.87                             | 90,823                                   | 0.83                             | 91,161                                   |
| 34           | 1,548                                     | -0.11                        | 62,331                              | 1.14                             | 120,280                                  | 1.02                             | 120,720                                  |
| 35           | 2,639                                     | -2.41                        | 90,678                              | 0.57                             | 73,854                                   | 0.63                             | 74,236                                   |
| 36           | 16,499                                    | 1.15                         | 59,137                              | 0.26                             | 54,062                                   | 0.48                             | 53,639                                   |
| 37           | 18,770                                    | 0.35                         | 57,760                              | 0.42                             | 60,192                                   | 0.56                             | 60,148                                   |
| 38           | 5,482                                     | -0.33                        | 57,272                              | 0.85                             | 90,725                                   | 0.82                             | 91,024                                   |
| 39           | 20,506                                    | 1.11                         | 53,507                              | 0.72                             | 90,526                                   | 0.76                             | 90,359                                   |
| 40           | 3,973                                     | -3.15                        | 111,636                             | 0.91                             | 106,720                                  | 0.89                             | 106,656                                  |
| 41           | 1,373                                     | -0.30                        | 64,126                              | 1.17                             | 129,708                                  | 1.05                             | 130,137                                  |

| <b>Index</b> | electrostatic<br>map_hyd.gri<br>d_avelog | electrostatic<br>map_hyd.gri<br>d_aboveThre<br>shold | interactionpo<br>tential_br.gri<br>d_avelog | interactionpo<br>tential_br.gri<br>d_aboveThre<br>shold | interactionpo<br>tential_br-<br>.grid_avelog | interactionpo<br>tential_br-<br>.grid_aboveT<br>hreshold | interactionpo<br>tential_c1=.g<br>rid_avelog |
|--------------|------------------------------------------|------------------------------------------------------|---------------------------------------------|---------------------------------------------------------|----------------------------------------------|----------------------------------------------------------|----------------------------------------------|
| 1            | 1.11                                     | 82,774                                               | 2.88                                        | 32,358                                                  | 2.89                                         | 32,512                                                   | 2.70                                         |
| 2            | 0.91                                     | 66,297                                               | 2.69                                        | 26,278                                                  | 2.70                                         | 26,402                                                   | 2.52                                         |
| 3            | 0.82                                     | 60,545                                               | 2.66                                        | 20,910                                                  | 2.67                                         | 20,995                                                   | 2.49                                         |
| 4            | 0.84                                     | 57,651                                               | 2.70                                        | 22,712                                                  | 2.72                                         | 22,800                                                   | 2.54                                         |
| 5            | 0.99                                     | 68,053                                               | 2.82                                        | 29,300                                                  | 2.84                                         | 29,434                                                   | 2.66                                         |
| 6            | 1.01                                     | 71,480                                               | 2.86                                        | 29,437                                                  | 2.88                                         | 29,585                                                   | 2.70                                         |
| 7            | 1.20                                     | 86,921                                               | 3.20                                        | 38,889                                                  | 3.23                                         | 39,106                                                   | 3.01                                         |
| 8            | 0.95                                     | 61,014                                               | 2.21                                        | 22,278                                                  | 2.05                                         | 17,892                                                   | 2.05                                         |
| 9            | 0.87                                     | 62,551                                               | 1.99                                        | 20,487                                                  | 1.99                                         | 20,563                                                   | 1.85                                         |
| 10           | 0.81                                     | 52,512                                               | 2.02                                        | 17,331                                                  | 2.02                                         | 17,383                                                   | 1.89                                         |
| 11           | 0.78                                     | 56,391                                               | 2.10                                        | 19,331                                                  | 2.10                                         | 19,391                                                   | 1.97                                         |
| 12           | 0.76                                     | 48,936                                               | 2.09                                        | 17,154                                                  | 2.09                                         | 17,218                                                   | 1.97                                         |
| 13           | 1.00                                     | 72,527                                               | 2.22                                        | 26,066                                                  | 2.23                                         | 26,185                                                   | 2.06                                         |
| 14           | 1.00                                     | 72,021                                               | 2.19                                        | 25,880                                                  | 2.20                                         | 26,005                                                   | 2.02                                         |
| 15           | 1.02                                     | 72,257                                               | 2.17                                        | 25,714                                                  | 2.18                                         | 25,835                                                   | 2.00                                         |
| 16           | 1.05                                     | 65,664                                               | 2.25                                        | 24,501                                                  | 2.28                                         | 24,615                                                   | 2.07                                         |
| 17           | 1.10                                     | 77,540                                               | 3.04                                        | 33,200                                                  | 3.06                                         | 33,399                                                   | 2.84                                         |
| 18           | 1.07                                     | 70,443                                               | 2.88                                        | 33,245                                                  | 2.90                                         | 33,437                                                   | 2.70                                         |
| 19           | 0.98                                     | 65,279                                               | 2.91                                        | 29,219                                                  | 2.93                                         | 29,390                                                   | 2.74                                         |
| 20           | 1.42                                     | 92,136                                               | 3.41                                        | 45,302                                                  | 3.43                                         | 45,598                                                   | 3.21                                         |
| 21           | 1.40                                     | 105,927                                              | 3.33                                        | 48,688                                                  | 3.36                                         | 48,983                                                   | 3.11                                         |
| 22           | 1.42                                     | 108,243                                              | 3.29                                        | 50,938                                                  | 3.33                                         | 51,222                                                   | 3.07                                         |
| 23           | 1.52                                     | 115,086                                              | 3.38                                        | 57,271                                                  | 3.42                                         | 57,584                                                   | 3.15                                         |
| 24           | 1.27                                     | 89,708                                               | 3.09                                        | 38,928                                                  | 3.12                                         | 39,114                                                   | 2.86                                         |
| 25           | 1.46                                     | 109,531                                              | 3.33                                        | 47,126                                                  | 3.36                                         | 47,365                                                   | 3.14                                         |
| 26           | 1.46                                     | 108,246                                              | 3.35                                        | 46,682                                                  | 3.37                                         | 46,937                                                   | 3.15                                         |
| 27           | 1.47                                     | 106,171                                              | 3.33                                        | 45,560                                                  | 3.36                                         | 45,822                                                   | 3.14                                         |
| 28           | 1.45                                     | 104,751                                              | 3.34                                        | 45,278                                                  | 3.36                                         | 45,545                                                   | 3.14                                         |
| 29           | 1.37                                     | 103,737                                              | 3.34                                        | 44,542                                                  | 3.36                                         | 44,801                                                   | 3.13                                         |
| 30           | 1.69                                     | 116,286                                              | 3.58                                        | 57,161                                                  | 3.61                                         | 57,489                                                   | 3.39                                         |
| 31           | 1.73                                     | 123,513                                              | 3.50                                        | 59,249                                                  | 3.53                                         | 59,591                                                   | 3.30                                         |
| 32           | 1.68                                     | 119,326                                              | 3.53                                        | 60,346                                                  | 3.56                                         | 60,685                                                   | 3.34                                         |
| 33           | 1.41                                     | 90,897                                               | 3.22                                        | 44,224                                                  | 3.24                                         | 44,480                                                   | 3.03                                         |
| 34           | 1.66                                     | 120,133                                              | 3.56                                        | 60,373                                                  | 3.58                                         | 60,716                                                   | 3.39                                         |
| 35           | 1.11                                     | 73,883                                               | 2.80                                        | 35,063                                                  | 2.82                                         | 35,244                                                   | 2.63                                         |
| 36           | 0.83                                     | 54,271                                               | 2.04                                        | 18,178                                                  | 2.04                                         | 18,222                                                   | 1.91                                         |
| 37           | 0.96                                     | 60,291                                               | 2.21                                        | 21,660                                                  | 2.22                                         | 21,747                                                   | 2.05                                         |
| 38           | 1.38                                     | 90,727                                               | 3.15                                        | 43,632                                                  | 3.17                                         | 43,861                                                   | 2.97                                         |
| 39           | 1.28                                     | 90,916                                               | 2.98                                        | 41,108                                                  | 3.02                                         | 41,304                                                   | 2.77                                         |
| 40           | 1.46                                     | 107,103                                              | 3.31                                        | 46,097                                                  | 3.34                                         | 46,335                                                   | 3.12                                         |
| 41           | 1.70                                     | 129,772                                              | 3.65                                        | 64,360                                                  | 3.68                                         | 64,739                                                   | 3.47                                         |

| <b>Index</b> | interactionpotential_c1=grid_aboveThreshold | interactionpotential_c2.grid_avelog | interactionpotential_c2.grid_aboveThreshold | interactionpotential_c3.grid_avelog | interactionpotential_c3.grid_aboveThreshold | interactionpotential_cl.grid_avelog | interactionpotential_cl.grid_aboveThreshold |
|--------------|---------------------------------------------|-------------------------------------|---------------------------------------------|-------------------------------------|---------------------------------------------|-------------------------------------|---------------------------------------------|
| 1            | 31,789                                      | 2.69                                | 31,818                                      | 2.76                                | 31,912                                      | 2.22                                | 20,047                                      |
| 2            | 25,871                                      | 2.50                                | 25,881                                      | 2.57                                | 25,939                                      | 2.55                                | 27,736                                      |
| 3            | 20,537                                      | 2.48                                | 20,632                                      | 2.55                                | 20,670                                      | 2.52                                | 22,046                                      |
| 4            | 22,304                                      | 2.53                                | 22,333                                      | 2.60                                | 22,390                                      | 2.57                                | 23,933                                      |
| 5            | 28,979                                      | 2.64                                | 29,081                                      | 2.71                                | 29,102                                      | 2.68                                | 31,092                                      |
| 6            | 29,004                                      | 2.68                                | 29,002                                      | 2.70                                | 27,702                                      | 2.72                                | 31,142                                      |
| 7            | 38,365                                      | 3.00                                | 38,517                                      | 3.07                                | 38,539                                      | 3.05                                | 41,309                                      |
| 8            | 22,001                                      | 2.04                                | 21,973                                      | 2.10                                | 21,987                                      | 2.07                                | 23,272                                      |
| 9            | 20,037                                      | 1.84                                | 20,088                                      | 1.89                                | 20,163                                      | 1.86                                | 21,547                                      |
| 10           | 16,913                                      | 1.88                                | 16,898                                      | 1.93                                | 16,912                                      | 1.89                                | 18,031                                      |
| 11           | 19,073                                      | 1.96                                | 19,041                                      | 2.02                                | 19,055                                      | 1.98                                | 20,225                                      |
| 12           | 16,837                                      | 1.96                                | 16,856                                      | 2.01                                | 16,897                                      | 1.98                                | 18,077                                      |
| 13           | 25,600                                      | 2.05                                | 25,650                                      | 2.11                                | 25,712                                      | 1.67                                | 16,166                                      |
| 14           | 25,394                                      | 2.01                                | 25,432                                      | 2.07                                | 25,534                                      | 2.05                                | 27,283                                      |
| 15           | 25,303                                      | 1.99                                | 25,325                                      | 2.05                                | 25,391                                      | 2.02                                | 27,084                                      |
| 16           | 24,220                                      | 2.06                                | 24,186                                      | 2.12                                | 24,203                                      | 2.10                                | 25,986                                      |
| 17           | 32,831                                      | 2.82                                | 32,817                                      | 2.90                                | 32,860                                      | 2.88                                | 35,193                                      |
| 18           | 32,815                                      | 2.68                                | 32,792                                      | 2.76                                | 32,835                                      | 2.74                                | 35,320                                      |
| 19           | 28,868                                      | 2.72                                | 28,853                                      | 2.79                                | 28,893                                      | 2.77                                | 31,037                                      |
| 20           | 44,837                                      | 3.20                                | 44,778                                      | 3.28                                | 44,823                                      | 3.26                                | 48,071                                      |
| 21           | 48,171                                      | 3.09                                | 48,128                                      | 3.17                                | 48,197                                      | 3.16                                | 51,604                                      |
| 22           | 50,407                                      | 3.05                                | 50,370                                      | 3.13                                | 50,439                                      | 3.12                                | 54,160                                      |
| 23           | 56,945                                      | 3.13                                | 56,869                                      | 3.21                                | 56,907                                      | 3.21                                | 60,407                                      |
| 24           | 38,323                                      | 2.85                                | 38,356                                      | 2.92                                | 38,486                                      | 2.91                                | 41,385                                      |
| 25           | 46,493                                      | 3.12                                | 46,501                                      | 3.20                                | 46,577                                      | 3.18                                | 49,944                                      |
| 26           | 46,156                                      | 3.14                                | 46,138                                      | 3.22                                | 46,218                                      | 3.19                                | 49,540                                      |
| 27           | 45,025                                      | 3.12                                | 44,992                                      | 3.20                                | 45,071                                      | 3.18                                | 48,352                                      |
| 28           | 44,712                                      | 3.12                                | 44,674                                      | 3.20                                | 44,757                                      | 3.18                                | 47,915                                      |
| 29           | 43,978                                      | 3.11                                | 43,970                                      | 3.19                                | 44,034                                      | 3.18                                | 47,152                                      |
| 30           | 56,717                                      | 3.38                                | 56,656                                      | 3.45                                | 56,699                                      | 3.43                                | 61,196                                      |
| 31           | 58,648                                      | 3.28                                | 58,605                                      | 3.36                                | 58,671                                      | 3.34                                | 62,865                                      |
| 32           | 58,549                                      | 3.33                                | 59,217                                      | 3.40                                | 59,879                                      | 3.38                                | 63,704                                      |
| 33           | 43,793                                      | 3.01                                | 43,746                                      | 3.09                                | 43,796                                      | 3.07                                | 46,870                                      |
| 34           | 59,295                                      | 3.37                                | 59,235                                      | 3.44                                | 59,335                                      | 3.41                                | 63,890                                      |
| 35           | 34,673                                      | 2.61                                | 34,645                                      | 2.68                                | 34,683                                      | 2.66                                | 37,178                                      |
| 36           | 17,920                                      | 1.90                                | 17,907                                      | 1.95                                | 17,910                                      | 1.92                                | 18,751                                      |
| 37           | 21,570                                      | 2.04                                | 21,542                                      | 2.10                                | 21,552                                      | 2.07                                | 22,881                                      |
| 38           | 43,328                                      | 2.95                                | 43,284                                      | 3.03                                | 43,307                                      | 3.01                                | 46,965                                      |
| 39           | 40,641                                      | 2.76                                | 40,620                                      | 2.83                                | 40,689                                      | 2.82                                | 43,543                                      |
| 40           | 45,524                                      | 3.10                                | 45,506                                      | 3.18                                | 45,580                                      | 3.16                                | 48,868                                      |
| 41           | 63,917                                      | 3.45                                | 63,801                                      | 3.53                                | 63,834                                      | 3.51                                | 68,271                                      |

| <b>Index</b> | interactionpo<br>tential_cl-<br>.grid_avelog | interactionpo<br>tential_cl-<br>.grid_aboveT<br>hreshold | interactionpo<br>tential_dry.gr<br>id_avelog | interactionpo<br>tential_dry.gr<br>id_aboveThr<br>eshold | interactionpo<br>tential_f.grid<br>_avelog | interactionpo<br>tential_f.grid<br>_aboveThres<br>hold | interactionpo<br>tential_f-<br>.grid_avelog |
|--------------|----------------------------------------------|----------------------------------------------------------|----------------------------------------------|----------------------------------------------------------|--------------------------------------------|--------------------------------------------------------|---------------------------------------------|
| 1            | 2.74                                         | 32,059                                                   | 0                                            | 791,925                                                  | 2.22                                       | 30,817                                                 | 2.22                                        |
| 2            | 2.55                                         | 26,089                                                   | 0                                            | 800,191                                                  | 2.07                                       | 25,126                                                 | 2.07                                        |
| 3            | 2.52                                         | 20,760                                                   | 0                                            | 784,821                                                  | 2.04                                       | 19,790                                                 | 2.03                                        |
| 4            | 2.57                                         | 22,483                                                   | 0                                            | 744,465                                                  | 2.09                                       | 21,629                                                 | 2.09                                        |
| 5            | 2.69                                         | 29,300                                                   | 0                                            | 781,004                                                  | 2.19                                       | 28,167                                                 | 2.19                                        |
| 6            | 2.73                                         | 29,234                                                   | 0                                            | 773,937                                                  | 2.22                                       | 28,125                                                 | 2.22                                        |
| 7            | 3.06                                         | 38,854                                                   | 0                                            | 811,750                                                  | 2.50                                       | 37,326                                                 | 2.52                                        |
| 8            | 2.07                                         | 22,117                                                   | 0                                            | 656,566                                                  | 1.66                                       | 21,304                                                 | 1.64                                        |
| 9            | 1.85                                         | 20,198                                                   | 0                                            | 710,979                                                  | 1.49                                       | 19,359                                                 | 1.45                                        |
| 10           | 1.88                                         | 16,975                                                   | 0                                            | 645,912                                                  | 1.52                                       | 16,345                                                 | 1.48                                        |
| 11           | 1.97                                         | 19,170                                                   | 0                                            | 755,050                                                  | 1.59                                       | 18,475                                                 | 1.56                                        |
| 12           | 1.97                                         | 16,968                                                   | 0                                            | 664,449                                                  | 1.59                                       | 16,199                                                 | 1.55                                        |
| 13           | 2.08                                         | 25,838                                                   | 0                                            | 736,749                                                  | 1.67                                       | 24,763                                                 | 1.65                                        |
| 14           | 2.05                                         | 25,615                                                   | 0                                            | 739,343                                                  | 1.64                                       | 24,536                                                 | 1.62                                        |
| 15           | 2.03                                         | 25,500                                                   | 0                                            | 728,877                                                  | 1.61                                       | 24,428                                                 | 1.59                                        |
| 16           | 2.11                                         | 24,359                                                   | 0                                            | 665,605                                                  | 1.67                                       | 23,129                                                 | 1.65                                        |
| 17           | 2.90                                         | 33,084                                                   | 0                                            | 753,607                                                  | 2.35                                       | 31,868                                                 | 2.36                                        |
| 18           | 2.75                                         | 33,121                                                   | 0                                            | 783,571                                                  | 2.23                                       | 31,886                                                 | 2.24                                        |
| 19           | 2.78                                         | 29,123                                                   | 0                                            | 773,368                                                  | 2.27                                       | 28,054                                                 | 2.28                                        |
| 20           | 3.27                                         | 45,211                                                   | 0                                            | 777,623                                                  | 2.68                                       | 43,675                                                 | 2.71                                        |
| 21           | 3.18                                         | 48,569                                                   | 0                                            | 802,977                                                  | 2.65                                       | 46,832                                                 | 2.66                                        |
| 22           | 3.14                                         | 50,844                                                   | 0                                            | 825,749                                                  | 2.61                                       | 49,054                                                 | 2.63                                        |
| 23           | 3.22                                         | 57,367                                                   | 0                                            | 879,447                                                  | 2.66                                       | 55,783                                                 | 2.69                                        |
| 24           | 2.93                                         | 38,659                                                   | 0                                            | 806,684                                                  | 2.39                                       | 37,357                                                 | 2.40                                        |
| 25           | 3.19                                         | 46,865                                                   | 0                                            | 769,463                                                  | 2.61                                       | 45,130                                                 | 2.63                                        |
| 26           | 3.21                                         | 46,534                                                   | 0                                            | 752,886                                                  | 2.62                                       | 44,832                                                 | 2.64                                        |
| 27           | 3.19                                         | 45,381                                                   | 0                                            | 721,663                                                  | 2.61                                       | 43,695                                                 | 2.63                                        |
| 28           | 3.19                                         | 45,074                                                   | 0                                            | 721,763                                                  | 2.61                                       | 43,375                                                 | 2.63                                        |
| 29           | 3.19                                         | 44,332                                                   | 0                                            | 762,127                                                  | 2.60                                       | 42,716                                                 | 2.62                                        |
| 30           | 3.45                                         | 57,150                                                   | 0                                            | 720,884                                                  | 2.88                                       | 55,377                                                 | 2.89                                        |
| 31           | 3.36                                         | 59,142                                                   | 0                                            | 780,155                                                  | 2.78                                       | 57,041                                                 | 2.79                                        |
| 32           | 3.40                                         | 59,811                                                   | 0                                            | 752,179                                                  | 2.83                                       | 56,748                                                 | 2.85                                        |
| 33           | 3.08                                         | 44,144                                                   | 0                                            | 722,520                                                  | 2.53                                       | 42,597                                                 | 2.55                                        |
| 34           | 3.43                                         | 59,808                                                   | 0                                            | 790,540                                                  | 2.85                                       | 56,892                                                 | 2.88                                        |
| 35           | 2.67                                         | 34,951                                                   | 0                                            | 794,424                                                  | 2.16                                       | 33,757                                                 | 2.17                                        |
| 36           | 1.91                                         | 18,004                                                   | 0                                            | 653,996                                                  | 1.54                                       | 17,509                                                 | 1.50                                        |
| 37           | 2.07                                         | 21,669                                                   | 0                                            | 647,665                                                  | 1.66                                       | 20,736                                                 | 1.64                                        |
| 38           | 3.02                                         | 43,647                                                   | 0                                            | 762,599                                                  | 2.47                                       | 42,409                                                 | 2.49                                        |
| 39           | 2.84                                         | 40,952                                                   | 0                                            | 801,699                                                  | 2.33                                       | 39,463                                                 | 2.34                                        |
| 40           | 3.17                                         | 45,883                                                   | 0                                            | 739,142                                                  | 2.59                                       | 44,158                                                 | 2.61                                        |
| 41           | 3.52                                         | 64,404                                                   | 0                                            | 799,286                                                  | 2.92                                       | 62,417                                                 | 2.96                                        |

| <b>Index</b> | interactionpotential_f-.grid_aboveThreshold | interactionpotential_i.grid_avelog | interactionpotential_i.grid_aboveThreshold | interactionpotential_k+.grid_avelog | interactionpotential_k+.grid_aboveThreshold | interactionpotential_n..grid_avelog | interactionpotential_n..grid_aboveThreshold |
|--------------|---------------------------------------------|------------------------------------|--------------------------------------------|-------------------------------------|---------------------------------------------|-------------------------------------|---------------------------------------------|
| 1            | 29,435                                      | 3.05                               | 32,990                                     | 2.44                                | 31,854                                      | 2.45                                | 31,601                                      |
| 2            | 23,996                                      | 2.85                               | 26,771                                     | 2.26                                | 25,940                                      | 2.28                                | 25,733                                      |
| 3            | 20,398                                      | 2.82                               | 21,409                                     | 2.25                                | 20,367                                      | 2.26                                | 20,376                                      |
| 4            | 20,492                                      | 2.86                               | 23,148                                     | 2.28                                | 22,359                                      | 2.31                                | 22,195                                      |
| 5            | 29,040                                      | 2.98                               | 29,926                                     | 2.38                                | 29,146                                      | 2.41                                | 28,968                                      |
| 6            | 29,103                                      | 3.03                               | 30,017                                     | 2.42                                | 29,171                                      | 2.45                                | 28,881                                      |
| 7            | 38,678                                      | 3.38                               | 39,700                                     | 2.70                                | 38,750                                      | 2.75                                | 38,248                                      |
| 8            | 21,855                                      | 2.38                               | 22,630                                     | 1.87                                | 21,914                                      | 1.86                                | 21,821                                      |
| 9            | 19,832                                      | 2.14                               | 21,027                                     | 1.71                                | 19,821                                      | 1.67                                | 19,824                                      |
| 10           | 16,673                                      | 2.17                               | 17,439                                     | 1.75                                | 16,711                                      | 1.70                                | 16,740                                      |
| 11           | 18,919                                      | 2.25                               | 19,477                                     | 1.81                                | 18,965                                      | 1.77                                | 19,078                                      |
| 12           | 16,698                                      | 2.22                               | 17,551                                     | 1.81                                | 16,680                                      | 1.77                                | 16,649                                      |
| 13           | 25,501                                      | 2.39                               | 26,679                                     | 1.88                                | 25,528                                      | 1.86                                | 25,417                                      |
| 14           | 25,318                                      | 2.37                               | 26,441                                     | 1.84                                | 25,303                                      | 1.83                                | 25,210                                      |
| 15           | 25,154                                      | 2.35                               | 26,325                                     | 1.81                                | 25,156                                      | 1.80                                | 25,101                                      |
| 16           | 23,833                                      | 2.44                               | 25,081                                     | 1.86                                | 23,914                                      | 1.86                                | 23,895                                      |
| 17           | 33,049                                      | 3.22                               | 33,821                                     | 2.56                                | 33,085                                      | 2.59                                | 32,673                                      |
| 18           | 33,056                                      | 3.04                               | 33,889                                     | 2.43                                | 33,177                                      | 2.46                                | 32,712                                      |
| 19           | 29,156                                      | 3.07                               | 29,764                                     | 2.46                                | 29,212                                      | 2.49                                | 28,793                                      |
| 20           | 45,370                                      | 3.59                               | 46,058                                     | 2.91                                | 45,537                                      | 2.94                                | 44,787                                      |
| 21           | 48,582                                      | 3.53                               | 49,586                                     | 2.82                                | 48,726                                      | 2.86                                | 48,050                                      |
| 22           | 50,890                                      | 3.50                               | 51,842                                     | 2.79                                | 51,069                                      | 2.82                                | 50,292                                      |
| 23           | 57,743                                      | 3.60                               | 57,970                                     | 2.86                                | 57,976                                      | 2.89                                | 56,972                                      |
| 24           | 38,602                                      | 3.31                               | 39,840                                     | 2.58                                | 38,747                                      | 2.61                                | 38,112                                      |
| 25           | 46,776                                      | 3.52                               | 47,998                                     | 2.83                                | 46,851                                      | 2.87                                | 46,304                                      |
| 26           | 46,408                                      | 3.53                               | 47,603                                     | 2.85                                | 46,467                                      | 2.88                                | 45,965                                      |
| 27           | 45,239                                      | 3.52                               | 46,397                                     | 2.83                                | 45,329                                      | 2.86                                | 44,821                                      |
| 28           | 44,991                                      | 3.52                               | 46,112                                     | 2.84                                | 45,097                                      | 2.86                                | 44,523                                      |
| 29           | 44,257                                      | 3.53                               | 45,337                                     | 2.83                                | 44,397                                      | 2.86                                | 43,792                                      |
| 30           | 57,522                                      | 3.76                               | 58,620                                     | 3.08                                | 57,733                                      | 3.12                                | 56,696                                      |
| 31           | 59,268                                      | 3.69                               | 60,179                                     | 2.99                                | 59,502                                      | 3.02                                | 58,521                                      |
| 32           | 59,049                                      | 3.71                               | 61,110                                     | 3.03                                | 59,270                                      | 3.07                                | 58,316                                      |
| 33           | 44,241                                      | 3.39                               | 44,857                                     | 2.73                                | 44,400                                      | 2.76                                | 43,686                                      |
| 34           | 59,239                                      | 3.74                               | 61,182                                     | 3.07                                | 59,364                                      | 3.11                                | 59,251                                      |
| 35           | 34,976                                      | 2.96                               | 35,638                                     | 2.34                                | 35,087                                      | 2.38                                | 34,573                                      |
| 36           | 17,884                                      | 2.20                               | 18,279                                     | 1.76                                | 17,933                                      | 1.72                                | 17,923                                      |
| 37           | 21,427                                      | 2.38                               | 22,194                                     | 1.87                                | 21,328                                      | 1.85                                | 21,401                                      |
| 38           | 43,919                                      | 3.32                               | 44,980                                     | 2.68                                | 44,100                                      | 2.71                                | 43,334                                      |
| 39           | 40,920                                      | 3.19                               | 41,816                                     | 2.50                                | 41,034                                      | 2.54                                | 40,485                                      |
| 40           | 45,762                                      | 3.50                               | 46,977                                     | 2.82                                | 45,873                                      | 2.85                                | 45,329                                      |
| 41           | 64,832                                      | 3.83                               | 65,221                                     | 3.15                                | 65,108                                      | 3.19                                | 63,898                                      |

| <b>Index</b> | interactionpotential_n1.gri<br>d_avelog | interactionpotential_n1.gri<br>d_aboveThreshold | interactionpotential_n1..gr<br>id_avelog | interactionpotential_n1..gr<br>id_aboveThreshold | interactionpotential_n1+.g<br>rid_avelog | interactionpotential_n1+.g<br>rid_aboveThreshold | interactionpotential_n1=.g<br>rid_avelog |
|--------------|-----------------------------------------|-------------------------------------------------|------------------------------------------|--------------------------------------------------|------------------------------------------|--------------------------------------------------|------------------------------------------|
| 1            | 2.50                                    | 31,651                                          | 2.50                                     | 31,650                                           | 2.52                                     | 31,649                                           | 2.56                                     |
| 2            | 2.33                                    | 25,764                                          | 2.33                                     | 25,764                                           | 2.35                                     | 25,764                                           | 2.39                                     |
| 3            | 2.30                                    | 20,407                                          | 2.31                                     | 20,407                                           | 2.34                                     | 20,407                                           | 2.37                                     |
| 4            | 2.35                                    | 22,224                                          | 2.35                                     | 22,224                                           | 2.37                                     | 22,223                                           | 2.41                                     |
| 5            | 2.46                                    | 29,023                                          | 2.46                                     | 29,023                                           | 2.48                                     | 29,021                                           | 2.52                                     |
| 6            | 2.50                                    | 28,931                                          | 2.50                                     | 28,929                                           | 2.51                                     | 28,929                                           | 2.55                                     |
| 7            | 2.80                                    | 38,324                                          | 2.80                                     | 38,324                                           | 2.81                                     | 38,323                                           | 2.85                                     |
| 8            | 1.88                                    | 21,856                                          | 1.89                                     | 21,855                                           | 1.94                                     | 21,855                                           | 1.97                                     |
| 9            | 1.69                                    | 19,842                                          | 1.70                                     | 19,842                                           | 1.78                                     | 19,842                                           | 1.80                                     |
| 10           | 1.72                                    | 16,750                                          | 1.73                                     | 16,750                                           | 1.82                                     | 16,750                                           | 1.84                                     |
| 11           | 1.80                                    | 19,094                                          | 1.81                                     | 19,094                                           | 1.88                                     | 19,094                                           | 1.90                                     |
| 12           | 1.80                                    | 16,671                                          | 1.81                                     | 16,671                                           | 1.87                                     | 16,671                                           | 1.90                                     |
| 13           | 1.89                                    | 25,453                                          | 1.86                                     | 24,256                                           | 1.95                                     | 25,453                                           | 1.97                                     |
| 14           | 1.86                                    | 25,262                                          | 1.86                                     | 25,262                                           | 1.91                                     | 25,261                                           | 1.94                                     |
| 15           | 1.83                                    | 25,137                                          | 1.83                                     | 25,137                                           | 1.88                                     | 25,137                                           | 1.91                                     |
| 16           | 1.90                                    | 23,939                                          | 1.90                                     | 23,938                                           | 1.93                                     | 23,937                                           | 1.96                                     |
| 17           | 2.64                                    | 32,733                                          | 2.64                                     | 32,730                                           | 2.65                                     | 32,729                                           | 2.69                                     |
| 18           | 2.50                                    | 32,785                                          | 2.50                                     | 32,785                                           | 2.51                                     | 32,784                                           | 2.55                                     |
| 19           | 2.54                                    | 28,863                                          | 2.54                                     | 28,862                                           | 2.55                                     | 28,861                                           | 2.59                                     |
| 20           | 3.00                                    | 44,866                                          | 3.00                                     | 44,865                                           | 3.00                                     | 44,863                                           | 3.05                                     |
| 21           | 2.90                                    | 48,131                                          | 2.90                                     | 48,131                                           | 2.91                                     | 48,130                                           | 2.95                                     |
| 22           | 2.86                                    | 50,386                                          | 2.87                                     | 50,386                                           | 2.87                                     | 50,386                                           | 2.91                                     |
| 23           | 2.94                                    | 57,088                                          | 2.93                                     | 57,088                                           | 2.94                                     | 57,083                                           | 2.99                                     |
| 24           | 2.65                                    | 38,177                                          | 2.66                                     | 38,176                                           | 2.67                                     | 38,174                                           | 2.71                                     |
| 25           | 2.92                                    | 46,379                                          | 2.92                                     | 46,379                                           | 2.93                                     | 46,379                                           | 2.98                                     |
| 26           | 2.94                                    | 46,065                                          | 2.94                                     | 46,065                                           | 2.94                                     | 46,062                                           | 2.99                                     |
| 27           | 2.92                                    | 44,919                                          | 2.92                                     | 44,919                                           | 2.93                                     | 44,918                                           | 2.98                                     |
| 28           | 2.92                                    | 44,601                                          | 2.92                                     | 44,601                                           | 2.93                                     | 44,601                                           | 2.98                                     |
| 29           | 2.92                                    | 43,875                                          | 2.92                                     | 43,875                                           | 2.92                                     | 43,873                                           | 2.97                                     |
| 30           | 3.18                                    | 56,813                                          | 3.18                                     | 56,813                                           | 3.18                                     | 56,813                                           | 3.23                                     |
| 31           | 3.08                                    | 58,650                                          | 3.08                                     | 58,650                                           | 3.09                                     | 58,647                                           | 3.14                                     |
| 32           | 3.13                                    | 58,438                                          | 3.13                                     | 58,437                                           | 3.13                                     | 58,437                                           | 3.18                                     |
| 33           | 2.82                                    | 43,787                                          | 2.82                                     | 43,786                                           | 2.82                                     | 43,785                                           | 2.87                                     |
| 34           | 3.17                                    | 59,407                                          | 3.17                                     | 59,407                                           | 3.17                                     | 59,406                                           | 3.22                                     |
| 35           | 2.43                                    | 34,632                                          | 2.43                                     | 34,632                                           | 2.44                                     | 34,632                                           | 2.48                                     |
| 36           | 1.74                                    | 17,940                                          | 1.75                                     | 17,940                                           | 1.83                                     | 17,939                                           | 1.85                                     |
| 37           | 1.88                                    | 21,426                                          | 1.88                                     | 21,426                                           | 1.94                                     | 21,426                                           | 1.96                                     |
| 38           | 2.76                                    | 43,421                                          | 2.76                                     | 43,421                                           | 2.77                                     | 43,421                                           | 2.81                                     |
| 39           | 2.57                                    | 40,555                                          | 2.57                                     | 40,555                                           | 2.58                                     | 40,554                                           | 2.62                                     |
| 40           | 2.91                                    | 45,413                                          | 2.91                                     | 45,413                                           | 2.91                                     | 45,412                                           | 2.96                                     |
| 41           | 3.25                                    | 64,036                                          | 3.25                                     | 64,036                                           | 3.25                                     | 64,032                                           | 3.30                                     |



| <b>Index</b> | interactionpotential_n1=.g<br>rid_aboveThreshold | interactionpotential_n2.gri<br>d_avelog | interactionpotential_n2.gri<br>d_aboveThreshold | interactionpotential_n2+.g<br>rid_avelog | interactionpotential_n2+.g<br>rid_aboveThreshold | interactionpotential_n2=.g<br>rid_avelog | interactionpotential_n2=.g<br>rid_aboveThreshold |
|--------------|--------------------------------------------------|-----------------------------------------|-------------------------------------------------|------------------------------------------|--------------------------------------------------|------------------------------------------|--------------------------------------------------|
| 1            | 31,756                                           | 2.57                                    | 31,738                                          | 2.59                                     | 31,738                                           | 2.63                                     | 31,750                                           |
| 2            | 25,859                                           | 2.40                                    | 25,834                                          | 2.41                                     | 25,834                                           | 2.45                                     | 25,840                                           |
| 3            | 20,472                                           | 2.37                                    | 20,453                                          | 2.40                                     | 20,451                                           | 2.43                                     | 20,463                                           |
| 4            | 22,301                                           | 2.42                                    | 22,294                                          | 2.44                                     | 22,293                                           | 2.47                                     | 22,303                                           |
| 5            | 29,136                                           | 2.53                                    | 29,040                                          | 2.54                                     | 29,040                                           | 2.58                                     | 29,079                                           |
| 6            | 29,063                                           | 2.57                                    | 28,990                                          | 2.58                                     | 28,990                                           | 2.62                                     | 29,018                                           |
| 7            | 38,514                                           | 2.88                                    | 38,350                                          | 2.88                                     | 38,349                                           | 2.92                                     | 38,430                                           |
| 8            | 21,932                                           | 1.94                                    | 22,042                                          | 1.99                                     | 22,040                                           | 2.02                                     | 21,903                                           |
| 9            | 19,898                                           | 1.75                                    | 19,932                                          | 1.82                                     | 19,932                                           | 1.84                                     | 19,912                                           |
| 10           | 16,799                                           | 1.78                                    | 16,761                                          | 1.86                                     | 16,761                                           | 1.88                                     | 16,774                                           |
| 11           | 19,160                                           | 1.87                                    | 19,104                                          | 1.93                                     | 19,104                                           | 1.95                                     | 19,127                                           |
| 12           | 16,714                                           | 1.86                                    | 16,731                                          | 1.92                                     | 16,731                                           | 1.94                                     | 16,725                                           |
| 13           | 25,544                                           | 1.95                                    | 25,520                                          | 2.00                                     | 25,519                                           | 2.02                                     | 25,529                                           |
| 14           | 25,343                                           | 1.92                                    | 25,336                                          | 1.96                                     | 25,335                                           | 1.99                                     | 25,334                                           |
| 15           | 25,217                                           | 1.89                                    | 25,217                                          | 1.93                                     | 25,216                                           | 1.96                                     | 25,221                                           |
| 16           | 24,037                                           | 1.96                                    | 24,097                                          | 1.99                                     | 24,095                                           | 2.01                                     | 24,140                                           |
| 17           | 32,882                                           | 2.71                                    | 32,791                                          | 2.72                                     | 32,787                                           | 2.76                                     | 32,833                                           |
| 18           | 32,956                                           | 2.58                                    | 32,820                                          | 2.58                                     | 32,819                                           | 2.62                                     | 32,887                                           |
| 19           | 28,981                                           | 2.61                                    | 28,910                                          | 2.62                                     | 28,908                                           | 2.65                                     | 28,949                                           |
| 20           | 45,081                                           | 3.08                                    | 44,938                                          | 3.08                                     | 44,936                                           | 3.12                                     | 45,000                                           |
| 21           | 48,349                                           | 2.98                                    | 48,204                                          | 2.98                                     | 48,204                                           | 3.02                                     | 48,272                                           |
| 22           | 50,638                                           | 2.94                                    | 50,457                                          | 2.94                                     | 50,455                                           | 2.98                                     | 50,541                                           |
| 23           | 57,360                                           | 3.01                                    | 57,111                                          | 3.02                                     | 57,108                                           | 3.06                                     | 57,217                                           |
| 24           | 38,348                                           | 2.73                                    | 38,388                                          | 2.74                                     | 38,387                                           | 2.78                                     | 38,455                                           |
| 25           | 46,594                                           | 3.00                                    | 46,476                                          | 3.01                                     | 46,474                                           | 3.05                                     | 46,523                                           |
| 26           | 46,250                                           | 3.02                                    | 46,153                                          | 3.02                                     | 46,152                                           | 3.06                                     | 46,207                                           |
| 27           | 45,113                                           | 3.00                                    | 45,016                                          | 3.01                                     | 45,016                                           | 3.05                                     | 45,058                                           |
| 28           | 44,819                                           | 3.00                                    | 44,695                                          | 3.01                                     | 44,694                                           | 3.04                                     | 44,760                                           |
| 29           | 44,090                                           | 3.00                                    | 43,955                                          | 3.00                                     | 43,954                                           | 3.04                                     | 44,025                                           |
| 30           | 57,117                                           | 3.26                                    | 56,863                                          | 3.26                                     | 56,860                                           | 3.30                                     | 56,956                                           |
| 31           | 58,942                                           | 3.16                                    | 58,720                                          | 3.17                                     | 58,719                                           | 3.21                                     | 58,825                                           |
| 32           | 58,739                                           | 3.21                                    | 58,586                                          | 3.21                                     | 58,583                                           | 3.25                                     | 58,630                                           |
| 33           | 43,991                                           | 2.90                                    | 43,834                                          | 2.90                                     | 43,832                                           | 2.94                                     | 43,910                                           |
| 34           | 59,149                                           | 3.25                                    | 59,446                                          | 3.25                                     | 59,444                                           | 3.29                                     | 59,559                                           |
| 35           | 34,801                                           | 2.50                                    | 34,687                                          | 2.51                                     | 34,685                                           | 2.54                                     | 34,732                                           |
| 36           | 17,983                                           | 1.80                                    | 17,951                                          | 1.87                                     | 17,951                                           | 1.89                                     | 17,967                                           |
| 37           | 21,505                                           | 1.94                                    | 21,431                                          | 1.99                                     | 21,431                                           | 2.01                                     | 21,460                                           |
| 38           | 43,604                                           | 2.84                                    | 43,448                                          | 2.84                                     | 43,445                                           | 2.88                                     | 43,518                                           |
| 39           | 40,726                                           | 2.65                                    | 40,612                                          | 2.65                                     | 40,611                                           | 2.69                                     | 40,658                                           |
| 40           | 45,604                                           | 2.98                                    | 45,488                                          | 2.99                                     | 45,488                                           | 3.03                                     | 45,533                                           |
| 41           | 64,359                                           | 3.33                                    | 64,075                                          | 3.33                                     | 64,073                                           | 3.37                                     | 64,191                                           |

| <b>Index</b> | interactionpotential_n3+.grid_avelog | interactionpotential_n3+.grid_aboveThreshold | interactionpotential_na+.grid_avelog | interactionpotential_na+.grid_aboveThreshold | interactionpotential_o.grid_avelog | interactionpotential_o.grid_aboveThreshold | interactionpotential_o.grid_avelog |
|--------------|--------------------------------------|----------------------------------------------|--------------------------------------|----------------------------------------------|------------------------------------|--------------------------------------------|------------------------------------|
| 1            | 2.66                                 | 31,791                                       | 1.94                                 | 29,840                                       | 2.39                               | 31,572                                     | 2.52                               |
| 2            | 2.48                                 | 25,872                                       | 2.85                                 | 75,214                                       | 2.22                               | 25,710                                     | 2.34                               |
| 3            | 2.47                                 | 20,518                                       | 1.81                                 | 19,083                                       | 2.19                               | 20,341                                     | 2.31                               |
| 4            | 2.51                                 | 22,322                                       | 1.82                                 | 20,812                                       | 2.24                               | 22,167                                     | 2.37                               |
| 5            | 2.61                                 | 29,052                                       | 1.88                                 | 27,083                                       | 2.32                               | 27,578                                     | 2.48                               |
| 6            | 2.65                                 | 29,050                                       | 1.91                                 | 27,298                                       | 2.37                               | 28,850                                     | 2.51                               |
| 7            | 2.96                                 | 38,378                                       | 2.12                                 | 36,510                                       | 2.67                               | 38,233                                     | 2.83                               |
| 8            | 2.05                                 | 22,048                                       | 1.54                                 | 20,208                                       | 1.79                               | 21,811                                     | 1.88                               |
| 9            | 1.87                                 | 19,996                                       | 1.44                                 | 18,354                                       | 1.60                               | 19,807                                     | 1.68                               |
| 10           | 1.91                                 | 16,939                                       | 1.48                                 | 15,419                                       | 1.63                               | 16,727                                     | 1.71                               |
| 11           | 1.98                                 | 19,110                                       | 1.51                                 | 17,942                                       | 1.70                               | 19,068                                     | 1.80                               |
| 12           | 1.97                                 | 16,782                                       | 1.51                                 | 15,410                                       | 1.70                               | 16,635                                     | 1.80                               |
| 13           | 2.05                                 | 25,569                                       | 1.54                                 | 23,734                                       | 1.79                               | 25,393                                     | 1.89                               |
| 14           | 2.02                                 | 25,392                                       | 1.50                                 | 23,568                                       | 1.76                               | 25,189                                     | 1.86                               |
| 15           | 1.99                                 | 25,294                                       | 1.48                                 | 23,471                                       | 1.73                               | 25,070                                     | 1.83                               |
| 16           | 2.05                                 | 24,106                                       | 1.49                                 | 22,718                                       | 1.78                               | 23,719                                     | 1.91                               |
| 17           | 2.80                                 | 32,857                                       | 2.03                                 | 31,082                                       | 2.52                               | 32,643                                     | 2.66                               |
| 18           | 2.66                                 | 32,872                                       | 1.91                                 | 31,406                                       | 2.39                               | 32,693                                     | 2.53                               |
| 19           | 2.69                                 | 28,937                                       | 1.95                                 | 27,503                                       | 2.42                               | 28,780                                     | 2.56                               |
| 20           | 3.16                                 | 44,982                                       | 2.28                                 | 43,152                                       | 2.86                               | 44,762                                     | 3.03                               |
| 21           | 3.06                                 | 48,250                                       | 2.28                                 | 46,003                                       | 2.80                               | 48,012                                     | 2.94                               |
| 22           | 3.02                                 | 50,512                                       | 2.24                                 | 48,308                                       | 2.77                               | 50,254                                     | 2.90                               |
| 23           | 3.10                                 | 57,131                                       | 2.27                                 | 52,948                                       | 2.84                               | 56,949                                     | 2.97                               |
| 24           | 2.82                                 | 38,404                                       | 2.05                                 | 36,536                                       | 2.56                               | 38,094                                     | 2.68                               |
| 25           | 3.09                                 | 46,545                                       | 2.23                                 | 44,083                                       | 2.79                               | 46,271                                     | 2.95                               |
| 26           | 3.10                                 | 46,202                                       | 2.24                                 | 43,760                                       | 2.80                               | 45,927                                     | 2.97                               |
| 27           | 3.09                                 | 45,078                                       | 2.23                                 | 42,669                                       | 2.79                               | 44,783                                     | 2.95                               |
| 28           | 3.09                                 | 44,764                                       | 2.23                                 | 42,401                                       | 2.78                               | 44,491                                     | 2.95                               |
| 29           | 3.08                                 | 44,023                                       | 2.22                                 | 41,764                                       | 2.78                               | 43,766                                     | 2.95                               |
| 30           | 3.34                                 | 56,882                                       | 2.47                                 | 54,101                                       | 3.04                               | 56,673                                     | 3.21                               |
| 31           | 3.25                                 | 58,785                                       | 2.38                                 | 56,246                                       | 2.95                               | 58,481                                     | 3.12                               |
| 32           | 3.29                                 | 58,682                                       | 2.42                                 | 56,378                                       | 2.99                               | 58,263                                     | 3.17                               |
| 33           | 2.98                                 | 43,871                                       | 2.15                                 | 41,972                                       | 2.70                               | 43,661                                     | 2.85                               |
| 34           | 3.33                                 | 59,476                                       | 2.43                                 | 56,652                                       | 3.03                               | 58,437                                     | 3.20                               |
| 35           | 2.58                                 | 34,716                                       | 1.83                                 | 33,117                                       | 2.31                               | 34,558                                     | 2.46                               |
| 36           | 1.92                                 | 17,957                                       | 1.48                                 | 16,235                                       | 1.65                               | 17,921                                     | 1.74                               |
| 37           | 2.04                                 | 21,435                                       | 1.53                                 | 20,152                                       | 1.78                               | 21,395                                     | 1.88                               |
| 38           | 2.92                                 | 43,474                                       | 2.10                                 | 41,217                                       | 2.64                               | 43,329                                     | 2.80                               |
| 39           | 2.73                                 | 40,673                                       | 2.00                                 | 38,673                                       | 2.49                               | 40,461                                     | 2.60                               |
| 40           | 3.07                                 | 45,557                                       | 2.22                                 | 43,181                                       | 2.77                               | 45,294                                     | 2.94                               |
| 41           | 3.41                                 | 64,105                                       | 2.50                                 | 62,206                                       | 3.11                               | 63,858                                     | 3.29                               |

| <b>Index</b> | interactionpotential_o-grid_aboveThreshold | interactionpotential_o...grid_avelog | interactionpotential_o...grid_aboveThreshold | interactionpotential_o=.grid_avelog | interactionpotential_o=.grid_aboveThreshold | interactionpotential_o1.grid_avelog | interactionpotential_o1.grid_aboveThreshold |
|--------------|--------------------------------------------|--------------------------------------|----------------------------------------------|-------------------------------------|---------------------------------------------|-------------------------------------|---------------------------------------------|
| 1            | 31,799                                     | 2.52                                 | 31,799                                       | 2.52                                | 31,799                                      | 2.52                                | 33,245                                      |
| 2            | 25,895                                     | 2.34                                 | 25,895                                       | 2.34                                | 25,895                                      | 2.30                                | 25,634                                      |
| 3            | 20,417                                     | 2.31                                 | 20,417                                       | 2.31                                | 20,417                                      | 2.28                                | 20,264                                      |
| 4            | 22,330                                     | 2.37                                 | 22,330                                       | 2.37                                | 22,330                                      | 2.37                                | 23,363                                      |
| 5            | 29,127                                     | 2.48                                 | 29,127                                       | 2.48                                | 29,127                                      | 2.43                                | 28,893                                      |
| 6            | 29,119                                     | 2.52                                 | 29,119                                       | 2.52                                | 29,119                                      | 2.47                                | 28,748                                      |
| 7            | 38,626                                     | 2.83                                 | 38,626                                       | 2.83                                | 38,626                                      | 2.77                                | 38,127                                      |
| 8            | 21,847                                     | 1.88                                 | 21,847                                       | 1.89                                | 21,847                                      | 1.87                                | 21,761                                      |
| 9            | 19,870                                     | 1.68                                 | 19,870                                       | 1.68                                | 19,870                                      | 1.67                                | 19,781                                      |
| 10           | 16,661                                     | 1.72                                 | 16,661                                       | 1.72                                | 16,661                                      | 1.71                                | 16,703                                      |
| 11           | 19,050                                     | 1.80                                 | 19,050                                       | 1.80                                | 19,050                                      | 1.78                                | 19,036                                      |
| 12           | 16,712                                     | 1.80                                 | 16,712                                       | 1.80                                | 16,712                                      | 1.78                                | 16,602                                      |
| 13           | 25,554                                     | 1.89                                 | 25,554                                       | 1.89                                | 25,554                                      | 1.87                                | 25,334                                      |
| 14           | 25,351                                     | 1.86                                 | 25,351                                       | 1.86                                | 25,351                                      | 1.84                                | 25,127                                      |
| 15           | 25,192                                     | 1.84                                 | 25,192                                       | 1.84                                | 25,192                                      | 1.81                                | 25,006                                      |
| 16           | 23,976                                     | 1.91                                 | 23,976                                       | 1.91                                | 23,976                                      | 1.87                                | 23,652                                      |
| 17           | 33,026                                     | 2.66                                 | 33,026                                       | 2.66                                | 33,026                                      | 2.61                                | 32,558                                      |
| 18           | 33,044                                     | 2.53                                 | 33,044                                       | 2.53                                | 33,044                                      | 2.48                                | 32,592                                      |
| 19           | 29,099                                     | 2.57                                 | 29,099                                       | 2.57                                | 29,099                                      | 2.51                                | 28,675                                      |
| 20           | 45,273                                     | 3.03                                 | 45,273                                       | 3.03                                | 45,273                                      | 2.97                                | 44,607                                      |
| 21           | 48,550                                     | 2.94                                 | 48,550                                       | 2.94                                | 48,550                                      | 2.88                                | 47,857                                      |
| 22           | 50,854                                     | 2.90                                 | 50,854                                       | 2.90                                | 50,854                                      | 2.84                                | 50,092                                      |
| 23           | 57,654                                     | 2.97                                 | 57,654                                       | 2.97                                | 57,654                                      | 2.91                                | 56,770                                      |
| 24           | 38,526                                     | 2.68                                 | 38,526                                       | 2.68                                | 38,526                                      | 2.63                                | 38,001                                      |
| 25           | 46,757                                     | 2.95                                 | 46,757                                       | 2.95                                | 46,757                                      | 2.89                                | 46,138                                      |
| 26           | 46,395                                     | 2.97                                 | 46,395                                       | 2.97                                | 46,395                                      | 2.91                                | 45,789                                      |
| 27           | 45,230                                     | 2.95                                 | 45,230                                       | 2.95                                | 45,230                                      | 2.89                                | 44,646                                      |
| 28           | 44,979                                     | 2.95                                 | 44,979                                       | 2.95                                | 44,979                                      | 2.89                                | 44,352                                      |
| 29           | 44,249                                     | 2.95                                 | 44,249                                       | 2.95                                | 44,249                                      | 2.88                                | 43,626                                      |
| 30           | 57,423                                     | 3.21                                 | 57,423                                       | 3.21                                | 57,423                                      | 3.15                                | 56,524                                      |
| 31           | 59,198                                     | 3.12                                 | 59,198                                       | 3.12                                | 59,198                                      | 3.05                                | 58,317                                      |
| 32           | 58,998                                     | 3.17                                 | 58,998                                       | 3.17                                | 58,998                                      | 3.10                                | 58,059                                      |
| 33           | 44,203                                     | 2.85                                 | 44,203                                       | 2.85                                | 44,203                                      | 2.79                                | 43,515                                      |
| 34           | 59,125                                     | 3.20                                 | 59,126                                       | 3.20                                | 59,125                                      | 3.14                                | 58,228                                      |
| 35           | 34,927                                     | 2.46                                 | 34,928                                       | 2.46                                | 34,927                                      | 2.40                                | 34,469                                      |
| 36           | 17,872                                     | 1.74                                 | 17,872                                       | 1.74                                | 17,872                                      | 1.73                                | 17,885                                      |
| 37           | 21,403                                     | 1.88                                 | 21,403                                       | 1.88                                | 21,403                                      | 1.86                                | 21,357                                      |
| 38           | 43,820                                     | 2.80                                 | 43,820                                       | 2.80                                | 43,819                                      | 2.73                                | 43,202                                      |
| 39           | 40,878                                     | 2.60                                 | 40,878                                       | 2.61                                | 40,878                                      | 2.55                                | 40,363                                      |
| 40           | 45,748                                     | 2.94                                 | 45,748                                       | 2.94                                | 45,747                                      | 2.88                                | 45,182                                      |
| 41           | 64,713                                     | 3.29                                 | 64,713                                       | 3.29                                | 64,713                                      | 3.22                                | 63,681                                      |

| <b>Index</b> | interactionpotential_oc2.g<br>rid_avelog | interactionpotential_oc2.g<br>rid_aboveTh<br>reshold | interactionpotential_oes.gr<br>id_avelog | interactionpotential_oes.gr<br>id_aboveTh<br>eshold | interactionpotential_oh.gri<br>d_avelog | interactionpotential_oh.gri<br>d_aboveThre<br>shold | interactionpotential_oh2.g<br>rid_avelog |
|--------------|------------------------------------------|------------------------------------------------------|------------------------------------------|-----------------------------------------------------|-----------------------------------------|-----------------------------------------------------|------------------------------------------|
| 1            | 2.37                                     | 31,264                                               | 2.37                                     | 31,264                                              | 2.51                                    | 31,679                                              | 2.51                                     |
| 2            | 2.20                                     | 25,465                                               | 2.20                                     | 25,465                                              | 2.34                                    | 26,324                                              | 2.33                                     |
| 3            | 2.18                                     | 20,110                                               | 2.18                                     | 20,110                                              | 2.31                                    | 20,418                                              | 2.31                                     |
| 4            | 2.22                                     | 21,942                                               | 2.22                                     | 21,942                                              | 2.36                                    | 22,239                                              | 2.36                                     |
| 5            | 2.32                                     | 28,581                                               | 2.32                                     | 28,581                                              | 2.47                                    | 29,053                                              | 3.06                                     |
| 6            | 2.35                                     | 28,565                                               | 2.35                                     | 28,565                                              | 2.51                                    | 28,957                                              | 2.50                                     |
| 7            | 2.64                                     | 37,816                                               | 2.64                                     | 37,816                                              | 2.81                                    | 38,371                                              | 2.80                                     |
| 8            | 1.77                                     | 21,496                                               | 1.76                                     | 21,496                                              | 1.89                                    | 21,876                                              | 1.90                                     |
| 9            | 1.58                                     | 19,667                                               | 1.58                                     | 19,667                                              | 1.69                                    | 19,850                                              | 1.71                                     |
| 10           | 1.62                                     | 16,591                                               | 1.61                                     | 16,590                                              | 1.73                                    | 16,765                                              | 1.74                                     |
| 11           | 1.69                                     | 18,777                                               | 1.69                                     | 18,777                                              | 1.81                                    | 19,110                                              | 1.82                                     |
| 12           | 1.69                                     | 16,485                                               | 1.69                                     | 16,485                                              | 1.80                                    | 16,685                                              | 1.81                                     |
| 13           | 1.77                                     | 25,174                                               | 1.77                                     | 25,174                                              | 1.89                                    | 25,472                                              | 1.90                                     |
| 14           | 1.74                                     | 24,949                                               | 1.74                                     | 24,949                                              | 1.86                                    | 25,270                                              | 1.87                                     |
| 15           | 1.71                                     | 24,820                                               | 1.71                                     | 24,820                                              | 1.83                                    | 25,151                                              | 1.84                                     |
| 16           | 1.76                                     | 23,514                                               | 1.76                                     | 23,514                                              | 1.90                                    | 23,962                                              | 1.90                                     |
| 17           | 2.48                                     | 32,337                                               | 2.48                                     | 32,337                                              | 2.65                                    | 32,761                                              | 2.64                                     |
| 18           | 2.36                                     | 32,323                                               | 2.36                                     | 32,323                                              | 2.51                                    | 32,823                                              | 2.51                                     |
| 19           | 2.40                                     | 28,469                                               | 2.40                                     | 28,469                                              | 2.55                                    | 28,891                                              | 2.54                                     |
| 20           | 2.83                                     | 44,251                                               | 2.83                                     | 44,251                                              | 3.01                                    | 44,916                                              | 3.00                                     |
| 21           | 2.78                                     | 47,480                                               | 2.78                                     | 47,480                                              | 2.92                                    | 48,185                                              | 2.91                                     |
| 22           | 2.75                                     | 49,706                                               | 2.75                                     | 49,706                                              | 2.88                                    | 50,443                                              | 2.87                                     |
| 23           | 2.81                                     | 56,380                                               | 2.81                                     | 56,380                                              | 2.95                                    | 57,149                                              | 2.94                                     |
| 24           | 2.53                                     | 37,755                                               | 2.53                                     | 37,755                                              | 2.67                                    | 38,211                                              | 2.66                                     |
| 25           | 2.76                                     | 45,809                                               | 2.76                                     | 45,809                                              | 2.94                                    | 46,421                                              | 2.93                                     |
| 26           | 2.78                                     | 45,478                                               | 2.78                                     | 45,478                                              | 2.95                                    | 46,116                                              | 2.94                                     |
| 27           | 2.76                                     | 44,346                                               | 2.76                                     | 44,346                                              | 2.93                                    | 44,976                                              | 2.92                                     |
| 28           | 2.76                                     | 44,026                                               | 2.76                                     | 44,026                                              | 2.93                                    | 44,654                                              | 2.92                                     |
| 29           | 2.75                                     | 43,314                                               | 2.75                                     | 43,314                                              | 2.93                                    | 43,930                                              | 2.92                                     |
| 30           | 3.01                                     | 56,111                                               | 3.01                                     | 56,111                                              | 3.19                                    | 56,875                                              | 3.18                                     |
| 31           | 2.92                                     | 57,858                                               | 2.92                                     | 57,858                                              | 3.10                                    | 58,716                                              | 3.08                                     |
| 32           | 2.97                                     | 57,586                                               | 2.97                                     | 57,586                                              | 3.14                                    | 58,504                                              | 3.13                                     |
| 33           | 2.67                                     | 43,175                                               | 2.67                                     | 43,175                                              | 2.83                                    | 43,831                                              | 2.82                                     |
| 34           | 3.00                                     | 57,778                                               | 3.00                                     | 57,778                                              | 3.18                                    | 59,341                                              | 3.17                                     |
| 35           | 2.29                                     | 34,230                                               | 2.29                                     | 34,230                                              | 2.44                                    | 34,672                                              | 2.43                                     |
| 36           | 1.64                                     | 17,806                                               | 1.64                                     | 17,806                                              | 1.75                                    | 17,954                                              | 1.76                                     |
| 37           | 1.76                                     | 21,084                                               | 1.76                                     | 21,084                                              | 1.88                                    | 21,443                                              | 1.89                                     |
| 38           | 2.61                                     | 42,890                                               | 2.61                                     | 42,890                                              | 2.78                                    | 43,464                                              | 2.76                                     |
| 39           | 2.47                                     | 40,059                                               | 2.47                                     | 40,059                                              | 2.59                                    | 40,600                                              | 2.58                                     |
| 40           | 2.74                                     | 44,835                                               | 2.74                                     | 44,835                                              | 2.92                                    | 45,460                                              | 2.91                                     |
| 41           | 3.07                                     | 63,171                                               | 3.07                                     | 63,171                                              | 3.26                                    | 64,103                                              | 3.25                                     |

| <b>Index</b> | interactionpotential_oh2.grid_aboveThreshold | interactionpotential_on.grid_avelog | interactionpotential_on.grid_aboveThreshold | interactionpotential_po4.grid_avelog | interactionpotential_po4.grid_aboveThreshold | interactionpotential_po4h.grid_avelog | interactionpotential_po4h.grid_aboveThreshold |
|--------------|----------------------------------------------|-------------------------------------|---------------------------------------------|--------------------------------------|----------------------------------------------|---------------------------------------|-----------------------------------------------|
| 1            | 31,685                                       | 2.53                                | 31,799                                      | 3.13                                 | 32,985                                       | 3.13                                  | 32,985                                        |
| 2            | 25,800                                       | 2.35                                | 25,895                                      | 2.92                                 | 26,745                                       | 2.92                                  | 26,745                                        |
| 3            | 20,460                                       | 2.32                                | 20,417                                      | 2.89                                 | 21,401                                       | 2.89                                  | 21,402                                        |
| 4            | 22,271                                       | 2.38                                | 22,330                                      | 2.93                                 | 23,154                                       | 2.94                                  | 23,154                                        |
| 5            | 49,860                                       | 2.49                                | 29,127                                      | 3.06                                 | 29,880                                       | 3.06                                  | 29,880                                        |
| 6            | 28,918                                       | 2.52                                | 29,119                                      | 3.11                                 | 29,989                                       | 3.11                                  | 29,989                                        |
| 7            | 38,250                                       | 2.83                                | 38,626                                      | 3.47                                 | 39,622                                       | 3.47                                  | 39,622                                        |
| 8            | 21,996                                       | 1.90                                | 21,847                                      | 2.43                                 | 22,782                                       | 2.44                                  | 22,782                                        |
| 9            | 19,936                                       | 1.70                                | 19,870                                      | 2.18                                 | 21,036                                       | 2.19                                  | 21,039                                        |
| 10           | 16,737                                       | 1.73                                | 16,661                                      | 2.21                                 | 17,791                                       | 2.22                                  | 17,791                                        |
| 11           | 19,069                                       | 1.82                                | 19,050                                      | 2.29                                 | 19,629                                       | 2.30                                  | 19,629                                        |
| 12           | 16,727                                       | 1.81                                | 16,712                                      | 2.27                                 | 17,575                                       | 2.28                                  | 17,575                                        |
| 13           | 25,485                                       | 1.90                                | 25,554                                      | 2.44                                 | 26,688                                       | 2.45                                  | 26,689                                        |
| 14           | 25,300                                       | 1.87                                | 25,351                                      | 2.43                                 | 26,458                                       | 2.43                                  | 26,458                                        |
| 15           | 25,188                                       | 1.85                                | 25,192                                      | 2.41                                 | 26,325                                       | 2.42                                  | 26,325                                        |
| 16           | 24,032                                       | 1.92                                | 23,977                                      | 2.52                                 | 25,040                                       | 2.52                                  | 25,040                                        |
| 17           | 32,721                                       | 2.67                                | 33,026                                      | 3.31                                 | 33,788                                       | 3.31                                  | 33,788                                        |
| 18           | 32,746                                       | 2.53                                | 33,044                                      | 3.12                                 | 33,845                                       | 3.12                                  | 33,845                                        |
| 19           | 28,816                                       | 2.57                                | 29,098                                      | 3.15                                 | 29,734                                       | 3.15                                  | 29,734                                        |
| 20           | 44,805                                       | 3.03                                | 45,273                                      | 3.68                                 | 45,989                                       | 3.68                                  | 45,989                                        |
| 21           | 48,077                                       | 2.94                                | 48,550                                      | 3.62                                 | 49,555                                       | 3.62                                  | 49,557                                        |
| 22           | 50,315                                       | 2.90                                | 50,854                                      | 3.59                                 | 51,789                                       | 3.58                                  | 51,790                                        |
| 23           | 56,953                                       | 2.97                                | 57,654                                      | 3.69                                 | 57,859                                       | 3.69                                  | 57,861                                        |
| 24           | 38,291                                       | 2.69                                | 38,526                                      | 3.39                                 | 39,754                                       | 3.39                                  | 39,755                                        |
| 25           | 46,382                                       | 2.96                                | 46,757                                      | 3.60                                 | 47,968                                       | 3.61                                  | 47,968                                        |
| 26           | 46,039                                       | 2.97                                | 46,396                                      | 3.62                                 | 47,586                                       | 3.62                                  | 47,588                                        |
| 27           | 44,917                                       | 2.96                                | 45,230                                      | 3.61                                 | 46,355                                       | 3.61                                  | 46,358                                        |
| 28           | 44,592                                       | 2.96                                | 44,979                                      | 3.61                                 | 46,057                                       | 3.61                                  | 46,059                                        |
| 29           | 43,853                                       | 2.95                                | 44,249                                      | 3.61                                 | 45,297                                       | 3.62                                  | 45,298                                        |
| 30           | 56,699                                       | 3.22                                | 57,423                                      | 3.85                                 | 58,497                                       | 3.85                                  | 58,499                                        |
| 31           | 58,561                                       | 3.12                                | 59,197                                      | 3.78                                 | 60,111                                       | 3.78                                  | 60,112                                        |
| 32           | 58,434                                       | 3.17                                | 58,998                                      | 3.80                                 | 60,995                                       | 3.80                                  | 60,995                                        |
| 33           | 43,727                                       | 2.86                                | 44,203                                      | 3.48                                 | 44,794                                       | 3.48                                  | 44,794                                        |
| 34           | 59,271                                       | 3.21                                | 59,125                                      | 3.83                                 | 61,095                                       | 3.83                                  | 61,096                                        |
| 35           | 34,617                                       | 2.46                                | 34,927                                      | 3.04                                 | 35,582                                       | 3.05                                  | 35,582                                        |
| 36           | 17,922                                       | 1.76                                | 17,872                                      | 2.24                                 | 18,270                                       | 2.25                                  | 18,270                                        |
| 37           | 21,398                                       | 1.90                                | 21,403                                      | 2.44                                 | 22,163                                       | 2.45                                  | 22,163                                        |
| 38           | 43,339                                       | 2.80                                | 43,819                                      | 3.40                                 | 44,894                                       | 3.40                                  | 44,895                                        |
| 39           | 40,529                                       | 2.61                                | 40,878                                      | 3.27                                 | 41,783                                       | 3.27                                  | 41,783                                        |
| 40           | 45,403                                       | 2.94                                | 45,746                                      | 3.58                                 | 46,923                                       | 3.58                                  | 46,924                                        |
| 41           | 63,894                                       | 3.29                                | 64,712                                      | 3.92                                 | 65,099                                       | 3.92                                  | 65,100                                        |

**Supplementary Table SIII.** Nanodescriptors list

| <b>Descriptions</b>                                                                                                                                                                                                                                                                                                                                                              |  | <b>Nanodescriptors</b>                       |                                              |
|----------------------------------------------------------------------------------------------------------------------------------------------------------------------------------------------------------------------------------------------------------------------------------------------------------------------------------------------------------------------------------|--|----------------------------------------------|----------------------------------------------|
| Estimation of the exposed water-accessible surface area of the vGNP                                                                                                                                                                                                                                                                                                              |  | TotalSurfaceArea                             |                                              |
| Average surface area per ligand to estimate the exposure level of the surface ligands calculated by the surface area divided by number of ligands                                                                                                                                                                                                                                |  | AverageSurfaceAreaPerLigand                  |                                              |
| Total atomic partial charges                                                                                                                                                                                                                                                                                                                                                     |  | TotalPartialCharge                           |                                              |
| Average atomic partial charges per ligand                                                                                                                                                                                                                                                                                                                                        |  | AveragePartialChargePerLigand                |                                              |
| Van der Waals accessible surfaces (Interaction surfaces) that contour the regions of space accessible to the center of ligand atoms, hydrophobic potential accessed from hydrophobicity of the surface                                                                                                                                                                           |  | HydrophobicPotential                         |                                              |
| The Potential Energy Functions are used to evaluate the potential energy function on the current system. The potential energy of the system can be affected by atom properties, crystal cell properties, geometric restraints and the currently loaded forcefield parameters.                                                                                                    |  | PotentialEnergy                              |                                              |
| Probabilistic receptor preference maps that predict non-bonded contact preferences -- the preferred locations of hydrophobic and hydrophilic ligand atoms                                                                                                                                                                                                                        |  | contactpreference_hyd.grid_ave               |                                              |
|                                                                                                                                                                                                                                                                                                                                                                                  |  | contactpreference_hyd.grid_aboveThreshold    |                                              |
|                                                                                                                                                                                                                                                                                                                                                                                  |  | contactpreference_lpa.grid_ave               |                                              |
|                                                                                                                                                                                                                                                                                                                                                                                  |  | contactpreference_lpa.grid_aboveThreshold    |                                              |
| An electron density surface is a representation of the electron-density distribution in a unit cell, sampled over a grid and visualized as an isosurface.                                                                                                                                                                                                                        |  | electrondensity.grid_ave                     |                                              |
|                                                                                                                                                                                                                                                                                                                                                                                  |  | electrondensity.grid_aboveThreshold          |                                              |
| Electrostatic Feature Maps that predict the electrostatically preferred locations of hydrophobic, H-bond acceptor and H-bond donor sites from the solutions of the Poisson-Boltzmann Equation                                                                                                                                                                                    |  | electrostaticmap_acc.grid_avelog             |                                              |
|                                                                                                                                                                                                                                                                                                                                                                                  |  | electrostaticmap_acc.grid_aboveThreshold     |                                              |
|                                                                                                                                                                                                                                                                                                                                                                                  |  | electrostaticmap_don.grid_avelog             |                                              |
|                                                                                                                                                                                                                                                                                                                                                                                  |  | electrostaticmap_don.grid_aboveThreshold     |                                              |
|                                                                                                                                                                                                                                                                                                                                                                                  |  | electrostaticmap_hyd.grid_avelog             |                                              |
| An Interaction Potential map provides a graphical representation of where a chemical probe has favorable interactions with a molecular surface. To calculate these descriptors, a probe is an atom representation of a particular chemical functionality. These descriptors cover basic physico-chemical properties of surface ligands such as sizes, charges, and hydrogen bond |  | interactionpotential_br.grid_avelog          |                                              |
|                                                                                                                                                                                                                                                                                                                                                                                  |  | Bromine atom                                 | interactionpotential_br.grid_aboveThreshold  |
|                                                                                                                                                                                                                                                                                                                                                                                  |  |                                              | Bromide ion                                  |
|                                                                                                                                                                                                                                                                                                                                                                                  |  | interactionpotential_br-.grid_aboveThreshold |                                              |
|                                                                                                                                                                                                                                                                                                                                                                                  |  | Aromatic CH group                            | interactionpotential_c1=.grid_avelog         |
|                                                                                                                                                                                                                                                                                                                                                                                  |  |                                              | interactionpotential_c1=.grid_aboveThreshold |
|                                                                                                                                                                                                                                                                                                                                                                                  |  | Methylene CH group                           | interactionpotential_c2.grid_avelog          |

donor/acceptor properties. The descriptor calculation was based upon the work of GRID [Goodford 1985] [Boobbyer 1989], including calculating a three-term interaction energy for each point in a rectilinear grid. Interaction Potentials that predict the preferred location of user-specified probe atoms of varying parameters, based on a force field incorporating van der Waals, charge and hydrogen bonding terms

|                              |                                              |
|------------------------------|----------------------------------------------|
|                              | interactionpotential_c2.grid_aboveThreshold  |
| Methyl CH3 group             | interactionpotential_c3.grid_avelog          |
|                              | interactionpotential_c3.grid_aboveThreshold  |
| Chlorine atom                | interactionpotential_cl.grid_avelog          |
|                              | interactionpotential_cl.grid_aboveThreshold  |
| Chloride ion                 | interactionpotential_cl-.grid_avelog         |
|                              | interactionpotential_cl-.grid_aboveThreshold |
| Dry (hydrophobic) probe      | interactionpotential_dry.grid_avelog         |
|                              | interactionpotential_dry.grid_aboveThreshold |
| Fluorine atom                | interactionpotential_f.grid_avelog           |
|                              | interactionpotential_f.grid_aboveThreshold   |
| Fluoride ion                 | interactionpotential_f-.grid_avelog          |
|                              | interactionpotential_f-.grid_aboveThreshold  |
| Iodine atom                  | interactionpotential_i.grid_avelog           |
|                              | interactionpotential_i.grid_aboveThreshold   |
| Potassium cation             | interactionpotential_k+.grid_avelog          |
|                              | interactionpotential_k+.grid_aboveThreshold  |
| Nitrogen atom with lone pair | interactionpotential_n..grid_avelog          |
|                              | interactionpotential_n..grid_aboveThreshold  |
| Amide NH group               | interactionpotential_n1.grid_avelog          |
|                              | interactionpotential_n1.grid_aboveThreshold  |
| sp3 NH group with lone pair  | interactionpotential_n1..grid_avelog         |
|                              | interactionpotential_n1..grid_aboveThreshold |
| sp3 NH cation                | interactionpotential_n1+.grid_avelog         |
|                              | interactionpotential_n1+.grid_aboveThreshold |
| sp2 cationic NH group        | interactionpotential_n1=.grid_avelog         |
|                              | interactionpotential_n1=.grid_aboveThreshold |
| Amide NH2 group              | interactionpotential_n2.grid_avelog          |
|                              | interactionpotential_n2.grid_aboveThreshold  |
| sp3 cationic NH2 group       | interactionpotential_n2+.grid_avelog         |
|                              | interactionpotential_n2+.grid_aboveThreshold |
| sp2 cationic NH2 group       | interactionpotential_n2=.grid_avelog         |
|                              | interactionpotential_n2=.grid_aboveThreshold |
| sp3 cationic NH3 group       | interactionpotential_n3+.grid_avelog         |

|                               |                                               |
|-------------------------------|-----------------------------------------------|
|                               | interactionpotential_n3+.grid_aboveThreshold  |
| Sodium cation                 | interactionpotential_na+.grid_avelog          |
|                               | interactionpotential_na+.grid_aboveThreshold  |
| Carbonyl oxygen atom          | interactionpotential_o.grid_avelog            |
|                               | interactionpotential_o.grid_aboveThreshold    |
| Anionic phenolate oxygen atom | interactionpotential_o-.grid_avelog           |
|                               | interactionpotential_o-.grid_aboveThreshold   |
| Carboxy oxygen atom           | interactionpotential_o...grid_avelog          |
|                               | interactionpotential_o...grid_aboveThreshold  |
| Phosphate oxygen atom         | interactionpotential_o=.grid_avelog           |
|                               | interactionpotential_o=.grid_aboveThreshold   |
| Aliphatic hydroxyl group      | interactionpotential_o1.grid_avelog           |
|                               | interactionpotential_o1.grid_aboveThreshold   |
| Ether oxygen atom             | interactionpotential_oc2.grid_avelog          |
|                               | interactionpotential_oc2.grid_aboveThreshold  |
| Ester oxygen atom             | interactionpotential_oes.grid_avelog          |
|                               | interactionpotential_oes.grid_aboveThreshold  |
| Phenolic hydroxyl group       | interactionpotential_oh.grid_avelog           |
|                               | interactionpotential_oh.grid_aboveThreshold   |
| Water                         | interactionpotential_oh2.grid_avelog          |
|                               | interactionpotential_oh2.grid_aboveThreshold  |
| Nitro oxygen atom             | interactionpotential_on.grid_avelog           |
|                               | interactionpotential_on.grid_aboveThreshold   |
| PO4 dianion                   | interactionpotential_po4.grid_avelog          |
|                               | interactionpotential_po4.grid_aboveThreshold  |
| PO4H phosphate anion          | interactionpotential_po4h.grid_avelog         |
|                               | interactionpotential_po4h.grid_aboveThreshold |

\*All descriptors were calculated against the vGNPs

\*\_avelog: average of the log values of the interaction potential for each point in a rectilinear grid

\*\_aboveThreshold: number of points that possess interaction potential above the user-defined interaction threshold

\*For more details describing the surface feature extraction, please refer to ChemicalComputingGroupInc. Molecular Operating Environment (MOE). (2016).



Supplementary table SIV. The seven new GNPs external set

| GNP index | vGNPs                                                                                          |           | Predicted properties |                    |                                                |                                                  | Experimentally characterized properties |                 |            |                    |                                                |                                                  |
|-----------|------------------------------------------------------------------------------------------------|-----------|----------------------|--------------------|------------------------------------------------|--------------------------------------------------|-----------------------------------------|-----------------|------------|--------------------|------------------------------------------------|--------------------------------------------------|
|           | # Ligand / vGNP*                                                                               | Size (nm) | LogP                 | HO-1 level in A549 | Cell uptake in A549 (10 <sup>7</sup> GNP/cell) | Cell uptake in HEK293 (10 <sup>7</sup> GNP/cell) | # Ligand / GNP                          | Size (TEM) (nm) | LogP       | HO-1 level in A549 | Cell uptake in A549 (10 <sup>7</sup> GNP/cell) | Cell uptake in HEK293 (10 <sup>7</sup> GNP/cell) |
| 35        | 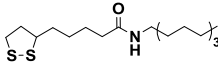 500 (100%)   | 6.5       | 0.81                 | 2.76               | 4.61                                           | 4.61                                             | 536 (100%)                              | 6.5             | 0.55±0.12  | 2.38±0.15          | 5.11±0.4                                       | 4.22±0.25                                        |
| 36        |  100 (67%)    | 5.8       | -2.32                | 2.85               | 1.3                                            | 1.47                                             | 102 (71%)                               | 5.8             | -2.54±0.07 | 2.7±0.66           | 2.34±0.14                                      | 2.31±0.42                                        |
|           |  50 (33%)     |           |                      |                    |                                                |                                                  | 42 (29%)                                |                 |            |                    |                                                |                                                  |
| 37        |  200 (80%)    | 5.8       | -2.46                | 1.19               | 0.55                                           | 0.55                                             | 185 (80%)                               | 5.8             | -2.13±0.5  | 0.9±0.21           | 0.4±0.02                                       | 0.4±0.01                                         |
|           |  50 (20%)     |           |                      |                    |                                                |                                                  | 47 (20%)                                |                 |            |                    |                                                |                                                  |
| 38        |  100 (25%)    | 5.2       | -0.79                | 1.99               | 1.65                                           | 1.88                                             | 126 (25%)                               | 5.2             | -2.29±0.06 | 2.41±0.37          | 0.63±0.02                                      | 0.61±0.04                                        |
|           |  400 (75%)    |           |                      |                    |                                                |                                                  | 380 (75%)                               |                 |            |                    |                                                |                                                  |
| 39        |  250 (50%)  | 5         | -1.84                | 1.91               | 0.63                                           | 0.66                                             | 275 (54%)                               | 5               | -2.3±0.15  | 2.04±0.28          | 0.58±0.05                                      | 0.59±0.03                                        |
|           |  250 (50%)  |           |                      |                    |                                                |                                                  | 235 (46%)                               |                 |            |                    |                                                |                                                  |
| 40        |  540 (60%)  | 7.3       | 2.32                 | 2.28               | 5.04                                           | 5.26                                             | 521 (60%)                               | 7.3             | 2.39±0.2   | 2.16±0.15          | 5.3±0.57                                       | 5.58±0.35                                        |
|           |  360 (40%)  |           |                      |                    |                                                |                                                  | 348 (40%)                               |                 |            |                    |                                                |                                                  |
| 41        |  850 (100%) | 5.9       | 2.12                 | 2.17               | 5.47                                           | 5.16                                             | 869 (100%)                              | 5.9             | 2.3±0.03   | 1.87±0.23          | 5.04±0.38                                      | 5.34±0.67                                        |

\*The number of ligands per GNP is approximated according to our rational design
